# Supplementary material for: Climate evolution across the Mid-Brunhes Transition
Source: Copernicus journal article supplement (doi:10.5194/cp-2018-20), 2018-03-27
Supplement: Supplementary file 1 [file cp-2018-20-supplement.pdf]

Table S1 - Data compilation

| Core         | Location                    | Latitude | Longitude | $\Delta t$ (ka) | Proxy                   | Researcher                    |
|--------------|-----------------------------|----------|-----------|-----------------|-------------------------|-------------------------------|
| DSDP 607     | Northeastern Atlantic       | 41.0012  | -32.9573  | 2.8             | SST - Transfer function | Ruddiman et al., 1989         |
| ODP 846      | Eastern Equatorial Pacific  | -3.0949  | -90.818   | 2.3             | SST - Uk37              | Herbert et al., 2010          |
| ODP 982      | North Atlantic              | 57.5165  | -15.8667  | 4.7             | SST - Uk37              | Lawrence et al., 2009         |
| ODP 1143     | Western Equatorial Pacific  | 9.3619   | 113.2851  | 1.9             | SST - Uk37              | Li et al., 2011               |
| ODP 1082     | South Atlantic              | -21.0941 | 11.8205   | 4.5             | SST - Uk37              | Etourneau et al., 2009        |
| ODP 1313     | North Atlantic              | 41.0011  | -32.9573  | 1.4             | SST - Uk37              | Naafs et al., 2012            |
| ODP 722      | Arabian Sea                 | 16.6218  | 59.7953   | 2.0             | SST - Uk37              | Herbert et al., 2010          |
| ODP 1146     | South China Sea             | 19.4567  | 116.2727  | 1.6             | SST - Uk37              | Herbert et al., 2010          |
| ODP 846      | Eastern Equatorial Pacific  | -3.0949  | -90.818   | 1.3             | SST - Uk37              | Liu and Herbert, 2004         |
| MD97-2140    | Western Pacific Warm Pool   | 2.1792   | 141.4581  | 3.9             | SST - Mg/Ca             | de Garidel-Thoron, 2005       |
| MD06-3018    | Tropical Western Pacific    | -22.5977 | 166.8628  | 5.2             | SST - Mg/Ca             | Russon et al., 2011           |
| ODP 806      | Western Equatorial Pacific  | 0.319    | 159.361   | 2.4             | SST - Mg/Ca             | Medina-Elizalde and Lea, 2005 |
| DSDP 594     | Southwest Pacific           | -45.5235 | 174.948   | 2.6             | SST - Modern analog     | Schaefer et al., 2005         |
| V22-174      | South Atlantic              | -10.0667 | -12.8167  | 4.1             | SST - Transfer function | Specmap, 1990                 |
| RC13-110     | Eastern Equatorial Pacific  | 0        | -96       | 4.9             | SST - Transfer function | Pisias et al., 1997           |
| ODP 659      | Eastern Equatorial Atlantic | 18.0772  | -21.0262  | 3.6             | Dust flux               | Tiedemann et al., 1994        |
| ODP 1090     | Subantarctic Atlantic       | -42.9137 | 8.8997    | 0.3             | Dust MAR                | Martinez-Garcia et al., 2011  |
| ODP 1090     | Subantarctic Atlantic       | -42.9137 | 8.8997    | 0.3             | Fe MAR                  | Martinez-Garcia et al., 2011  |
| CLP          | Chinese Loess Plateau       |          |           | 1.0             | Grain size              | Sun et al., 2005              |
| Lake Baikal  | Southern Russia             |          |           | 0.5             | Silica %                | Williams et al., 1997         |
| PS75-074     | Pacific Southern Ocean      | -56.4696 | -142.9954 | 0.4             | Fe counts               | Lamy et al., 2014             |
| PS75-076     | Pacific Southern Ocean      | -56.4696 | -142.9954 | 0.4             | Fe wt. %                | Lamy et al., 2014             |
| ODP 663      | Eastern Equatorial Atlantic | -1.1978  | -11.8785  | 2.7             | Terrestrial %           | deMenocal et al., 1993        |
| EPICA Dome C | Antarctica                  | -75.06   | 123.21    | 0.2             | Dust                    | Lambert et al., 2008          |
| ODP 982      | North Atlantic              | 57.5     | -15.9     | 2.5             | $\delta^{13}\text{C}$   | Venz et al., 1999             |
| ODP 983      | North Atlantic              | 60.4     | -23.6     | 1.0             | $\delta^{13}\text{C}$   | McIntyre et al., 1999         |
| ODP 984      | North Atlantic              | 61       | -24       | 3.5             | $\delta^{13}\text{C}$   | Raymo et al., 2004            |
| DSDP 607     | North Atlantic              | 41       | -33       | 4.1             | $\delta^{13}\text{C}$   | Ruddiman et al., 1989         |
| ODP 658      | North Atlantic              | 20.8     | -18.7     | 1.6             | $\delta^{13}\text{C}$   | Tiedemann et al., 1994        |
| U 1308       | North Atlantic              | 49.9     | -24.2     | 0.3             | $\delta^{13}\text{C}$   | Hodell et al., 2008           |
| ODP 980/981  | North Atlantic              | 55.5     | -14.7     | 1.6             | $\delta^{13}\text{C}$   | Oppo et al., 1998             |
| DSDP 502     | Equatorial Atlantic         | 11.5     | -79.4     |                 | $\delta^{13}\text{C}$   | deMenocal et al. 1992         |
| ODP 664      | Equatorial Atlantic         | 0.1      | -23.2     | 3.2             | $\delta^{13}\text{C}$   | Raymo et al., 1997            |
| ODP 925      | Equatorial Atlantic         | 4.2      | -43.5     | 4.3             | $\delta^{13}\text{C}$   | Bickert et al., 1997          |
| ODP 926      | Equatorial Atlantic         | 3.7      | -42.9     | 2.7             | $\delta^{13}\text{C}$   | Lisiecki et al., 2008         |
| ODP 927      | Equatorial Atlantic         | 5.5      | -44.5     |                 | $\delta^{13}\text{C}$   | Bickert et al., 1997          |
| ODP 929      | Equatorial Atlantic         | 5.5      | -44.5     | 4.9             | $\delta^{13}\text{C}$   | Bickert et al., 1997          |
| ODP 928      | Equatorial Atlantic         | 5.5      | -44.8     | 2.5             | $\delta^{13}\text{C}$   | Lisiecki et al., 2008         |
| ODP 1090     | South Atlantic              | -42.9    | 8.9       | 2.8             | $\delta^{13}\text{C}$   | Venz and Hodell, 2002         |
| GeoB 1032    | South Atlantic              | -22.9    | 6         | 3.7             | $\delta^{13}\text{C}$   | Bickert and Wefer, 1996       |
| GeoB 1035    | South Atlantic              | -21.6    | 5         | 3.9             | $\delta^{13}\text{C}$   | Bickert and Wefer, 1996       |
| ODP 1089     | South Atlantic              | -47.9    | 9.9       | 0.4             | $\delta^{13}\text{C}$   | Hodell et al., 2001           |
| GeoB 1211    | South Atlantic              | -24.5    | 7.5       | 4.9             | $\delta^{13}\text{C}$   | Bickert and Wefer, 1996       |
| GeoB 1214    | South Atlantic              | -24.7    | 7.2       | 4.5             | $\delta^{13}\text{C}$   | Bickert and Wefer, 1996       |
| RC13-229     | South Atlantic              | -25.5    | 11.3      | 3.8             | $\delta^{13}\text{C}$   | Oppo et al., 1990             |
| TN 576       | South Atlantic              | -42.9    | 8.9       | 1.5             | $\delta^{13}\text{C}$   | Hodell et al., 2000           |
| ODP 1143     | Pacific                     | 9.4      | -246.7    | 3.8             | $\delta^{13}\text{C}$   | Cheng et al., 2004            |
| ODP 677      | Pacific                     | 4.2      | -83.7     | 2.8             | $\delta^{13}\text{C}$   | Shackleton et al., 1990       |
| ODP 846      | Pacific                     | -3.1     | -90.8     | 2.2             | $\delta^{13}\text{C}$   | Mix et al., 1995              |
| ODP 849      | Pacific                     | 0.2      | -110.5    | 3.5             | $\delta^{13}\text{C}$   | Mix et al., 1995              |
| ODP 1123     | Southwest Pacific           | -41.7862 | -171.499  | 0.8             | Mg/Ca                   | Elderfield et al., 2012       |
| EPICA Dome C | Antarctica                  | -75.06   | 123.21    | 0.4             | CH <sub>4</sub>         | Loulergue et al., 2008        |
| EPICA Dome C | Antarctica                  | -75.06   | 123.21    | 0.4             | CO <sub>2</sub>         | Luthi et al., 2008            |
| EPICA Dome C | Antarctica                  | -75.06   | 123.21    | 3.0             | Deuterium               | EPICA Community Members, 2004 |

Table S2 - Variance tests

| Data Set                                     | Variable              | Period   | Variance <sup>a</sup> | F-test <sup>b</sup> |
|----------------------------------------------|-----------------------|----------|-----------------------|---------------------|
| SST_PC1                                      | SST                   | Post-MBT | 8.9681                | Reject              |
| SST_PC1                                      | SST                   | Pre-MBT  | 6.5399                |                     |
| SST_PC2                                      | SST                   | Post-MBT | 1.8564                |                     |
| SST_PC2                                      | SST                   | Pre-MBT  | 1.2808                |                     |
| EDC CO <sub>2</sub>                          | CO <sub>2</sub>       | Post-MBT | 619.6373              | Reject              |
| EDC CO <sub>2</sub>                          | CO <sub>2</sub>       | Pre-MBT  | 467.1198              |                     |
| $\delta^{13}\text{C}$ Atlantic PC1           | $\delta^{13}\text{C}$ | Post-MBT | 0.9950                | Reject              |
| $\delta^{13}\text{C}$ Atlantic PC1           | $\delta^{13}\text{C}$ | Pre-MBT  | 1.9414                |                     |
| $\delta^{13}\text{C}$ Atlantic PC1 no MIS 13 | $\delta^{13}\text{C}$ | Post-MBT | 0.9950                | Reject              |
| $\delta^{13}\text{C}$ Atlantic PC1 no MIS 13 | $\delta^{13}\text{C}$ | Pre-MBT  | 1.9414                |                     |
| $\delta^{13}\text{C}$ Atlantic PC2           | $\delta^{13}\text{C}$ | Post-MBT | 0.2365                | Reject              |
| $\delta^{13}\text{C}$ Atlantic PC2           | $\delta^{13}\text{C}$ | Pre-MBT  | 0.3378                |                     |
| $\delta^{13}\text{C}$ Pacific PC1            | $\delta^{13}\text{C}$ | Post-MBT | 0.2283                | Reject              |
| $\delta^{13}\text{C}$ Pacific PC1            | $\delta^{13}\text{C}$ | Pre-MBT  | 0.4317                |                     |
| $\delta^{13}\text{C}$ Global                 | $\delta^{13}\text{C}$ | Post-MBT | 1.1744                | Reject              |
| $\delta^{13}\text{C}$ Global                 | $\delta^{13}\text{C}$ | Pre-MBT  | 2.1739                |                     |
| $\delta^{13}\text{C}$ Global                 | $\delta^{13}\text{C}$ | Post-MBT | 1.1744                | Reject              |
| $\delta^{13}\text{C}$ Global                 | $\delta^{13}\text{C}$ | Pre-MBT  | 2.1739                |                     |
| LR04 $\delta^{18}\text{O}$                   | $\delta^{18}\text{O}$ | Post-MBT | 0.1965                | Reject              |
| LR04 $\delta^{18}\text{O}$                   | $\delta^{18}\text{O}$ | Pre-MBT  | 0.1572                |                     |
| Dust Global                                  | Dust                  | Post-MBT | 4.5498                | Reject              |
| Dust Global                                  | Dust                  | Pre-MBT  | 2.6819                |                     |
| EDC CH <sub>4</sub>                          | CH <sub>4</sub>       | Post-MBT | 5432.4                |                     |
| EDC CH <sub>4</sub>                          | CH <sub>4</sub>       | Pre-MBT  | 6012.4                |                     |
| EDC Temperature                              | Deuterium             | Post-MBT | 270.1                 | Reject              |
| EDC Temperature                              | Deuterium             | Pre-MBT  | 116.3                 |                     |
| Bottom water temp.                           | Mg/Ca                 | Post-MBT | 0.0105                | Reject              |
| Bottom water temp.                           | Mg/Ca                 | Pre-MBT  | 0.0069                |                     |

<sup>a</sup>Variance values for the intervals "Pre-MBT" (450-800 ka) and "Post-MBT" (0-350 ka)

<sup>b</sup>F-tests of the null hypothesis that variance in the Pre- and Post-MBT time intervals are the same

Table S3 - EOF Results

| Core                                      | EOF-1   | EOF-2   |
|-------------------------------------------|---------|---------|
| <i>Sea-surface temperature</i>            |         |         |
| DSDP 607                                  | 2.4611  | -1.4678 |
| ODP 846                                   | 0.6214  | 0.1373  |
| ODP 982                                   | 0.9055  | 0.1431  |
| ODP 1143                                  | 0.5791  | 0.0256  |
| ODP 1082                                  | 1.2605  | -0.0162 |
| ODP 1313                                  | 1.5653  | -0.0557 |
| ODP 722                                   | 0.6955  | -0.0637 |
| ODP 1146                                  | 0.6955  | -0.0637 |
| ODP 846                                   | 0.6214  | 0.1373  |
| MD97-2140                                 | 0.3085  | 0.0024  |
| MD06-3018                                 | 0.3711  | 0.1174  |
| ODP 806                                   | 0.6318  | 0.0738  |
| DSDP 594                                  | 1.6780  | 2.1688  |
| V22-174                                   | 0.4994  | -0.0700 |
| RC13-110                                  | 0.6403  | -0.2426 |
| <i>Dust</i>                               |         |         |
| ODP 659                                   | 0.356   | 0.646   |
| ODP 1090                                  | 0.9004  | -0.2768 |
| ODP 1090                                  | 0.8957  | -0.2884 |
| CLP                                       | -0.5902 | -0.4107 |
| PS75-074                                  | 0.8153  | -0.107  |
| PS75-076                                  | 0.8914  | -0.0061 |
| ODP 663                                   | 0.4237  | 0.6842  |
| EPICA Dome C                              | 0.8729  | -0.1856 |
| <i>Global <math>\delta^{13}C</math></i>   |         |         |
| ODP 982                                   | 0.0473  | -0.1403 |
| ODP 983                                   | 0.1598  | -0.1581 |
| ODP 984                                   | 0.1412  | -0.4831 |
| DSDP 607                                  | 0.4186  | 0.0256  |
| U 1308                                    | 0.3688  | 0.0163  |
| DSDP 502                                  | 0.0674  | -0.098  |
| ODP 980/981                               | 0.2748  | -0.1104 |
| ODP 664                                   | 0.3818  | 0.0776  |
| ODP 925                                   | 0.3548  | 0.027   |
| ODP 926                                   | 0.3949  | 0.0174  |
| ODP 927                                   | 0.3886  | 0.0161  |
| ODP 929                                   | 0.4186  | 0.0256  |
| ODP 928                                   | 0.4069  | 0.0414  |
| ODP 1090                                  | 0.3774  | 0.1325  |
| ODP 1143                                  | 0.1641  | -0.0143 |
| ODP 677                                   | 0.185   | -0.0199 |
| ODP 846                                   | 0.1795  | -0.0169 |
| ODP 849                                   | 0.1901  | -0.003  |
| <i>Atlantic <math>\delta^{13}C</math></i> |         |         |
| ODP 982                                   | 0.0459  | 0.1404  |
| ODP 983                                   | 0.1567  | 0.1579  |
| ODP 984                                   | 0.1373  | 0.4838  |
| DSDP 607                                  | 0.423   | -0.0194 |
| U 1308                                    | 0.3683  | -0.0141 |
| ODP 980/981                               | 0.2733  | 0.112   |
| DSDP 502                                  | 0.0674  | 0.0989  |
| ODP 664                                   | 0.3805  | -0.0756 |
| ODP 925                                   | 0.3555  | -0.0242 |
| ODP 926                                   | 0.3964  | -0.0136 |
| ODP 927                                   | 0.39    | -0.0129 |
| ODP 929                                   | 0.423   | -0.0194 |
| ODP 928                                   | 0.408   | -0.0379 |
| ODP 1090                                  | 0.3728  | -0.134  |
| <i>Pacific <math>\delta^{13}C</math></i>  |         |         |
| ODP 1143                                  | 0.5066  | -0.1312 |
| ODP 677                                   | 0.113   | 0.0389  |
| ODP 846                                   | 0.1482  | 0.1219  |
| ODP 849                                   | 0.2123  | 0.2073  |
