# Supplementary material for: Climate evolution across the Mid-Brunhes Transition
Source: Copernicus journal article supplement (doi:10.5194/cp-2018-20), 2018-03-27
Supplement: Supplementary file [file cp-2018-20-AC2-supplement.zip]

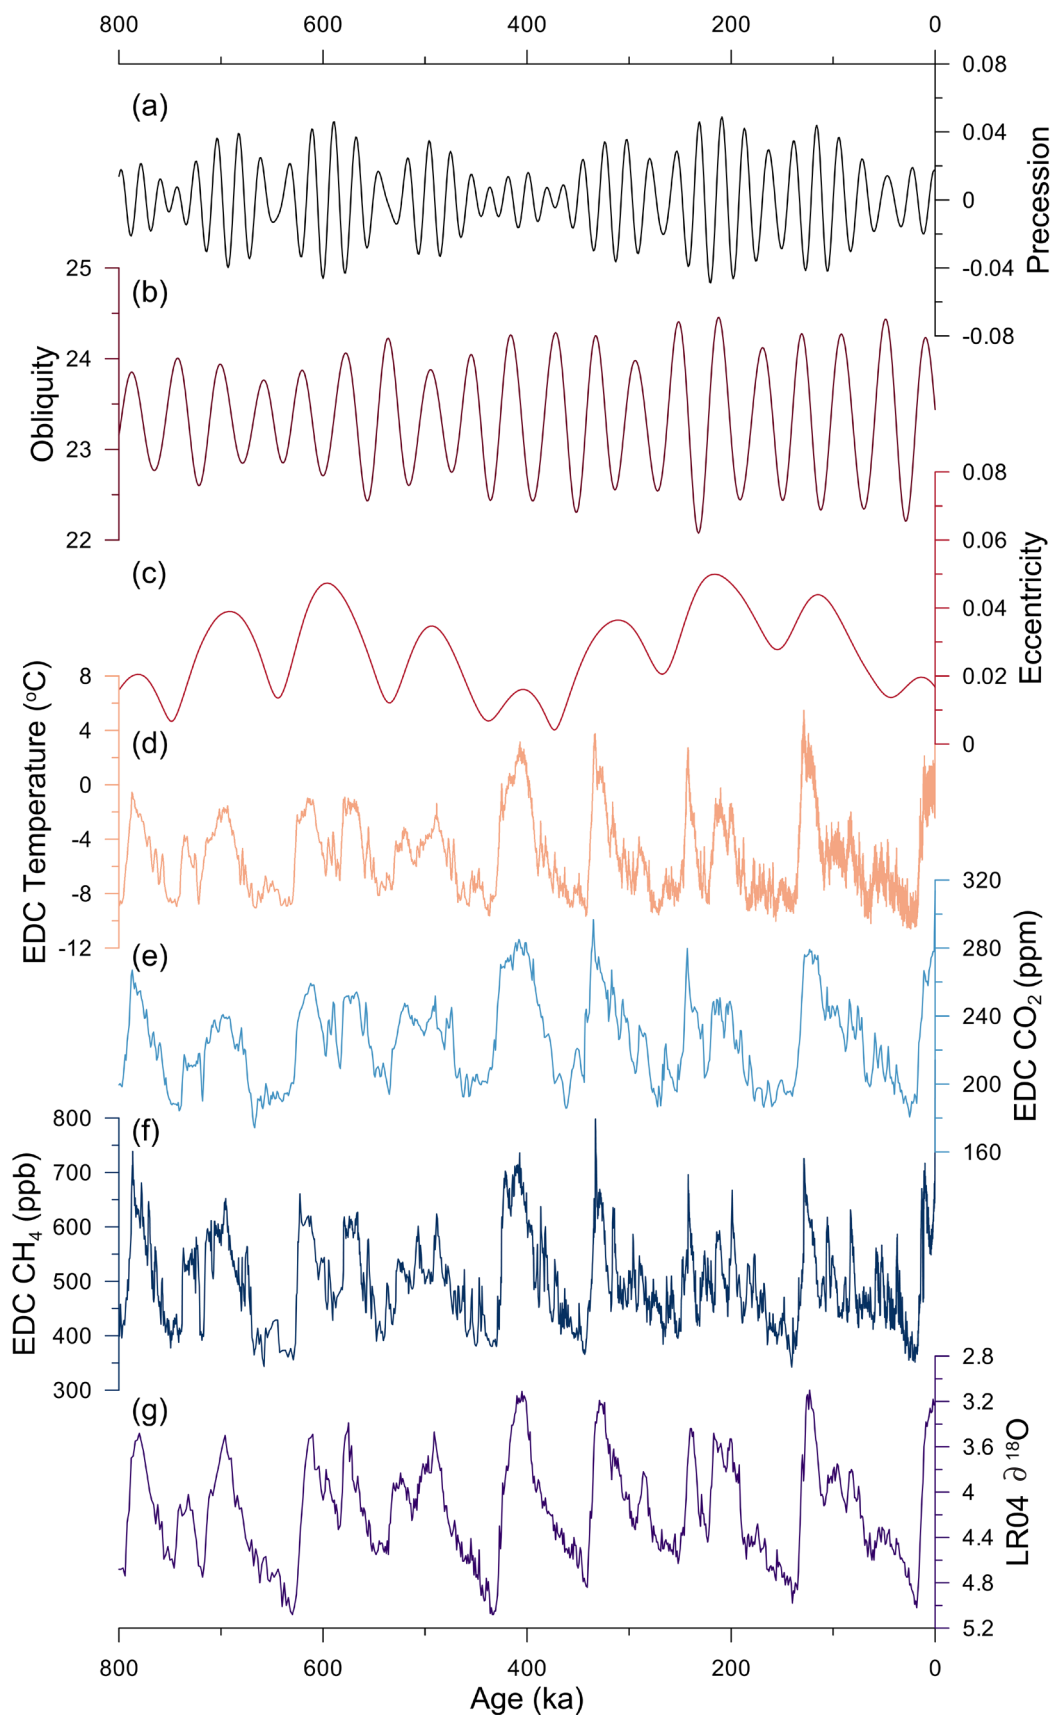

**Figure 1 – Orbital forcing and climate records for the last 800 kyr. a,** Precession. **b,** Obliquity. **c,** Eccentricity. **d,** Deuterium-derived temperature from the EPICA Dome C ice core in Antarctica (Jouzel et al., 2007). **e,** Atmospheric CO<sub>2</sub> from EPICA Dome C (EPICA community members, 2007, Lüthi et al., 2008). **f,** Atmospheric CH<sub>4</sub> from EPICA Dome C (EPICA community members, 2007). **g,** Global benthic oxygen isotope stack (Lisiecki and Raymo, 2005).

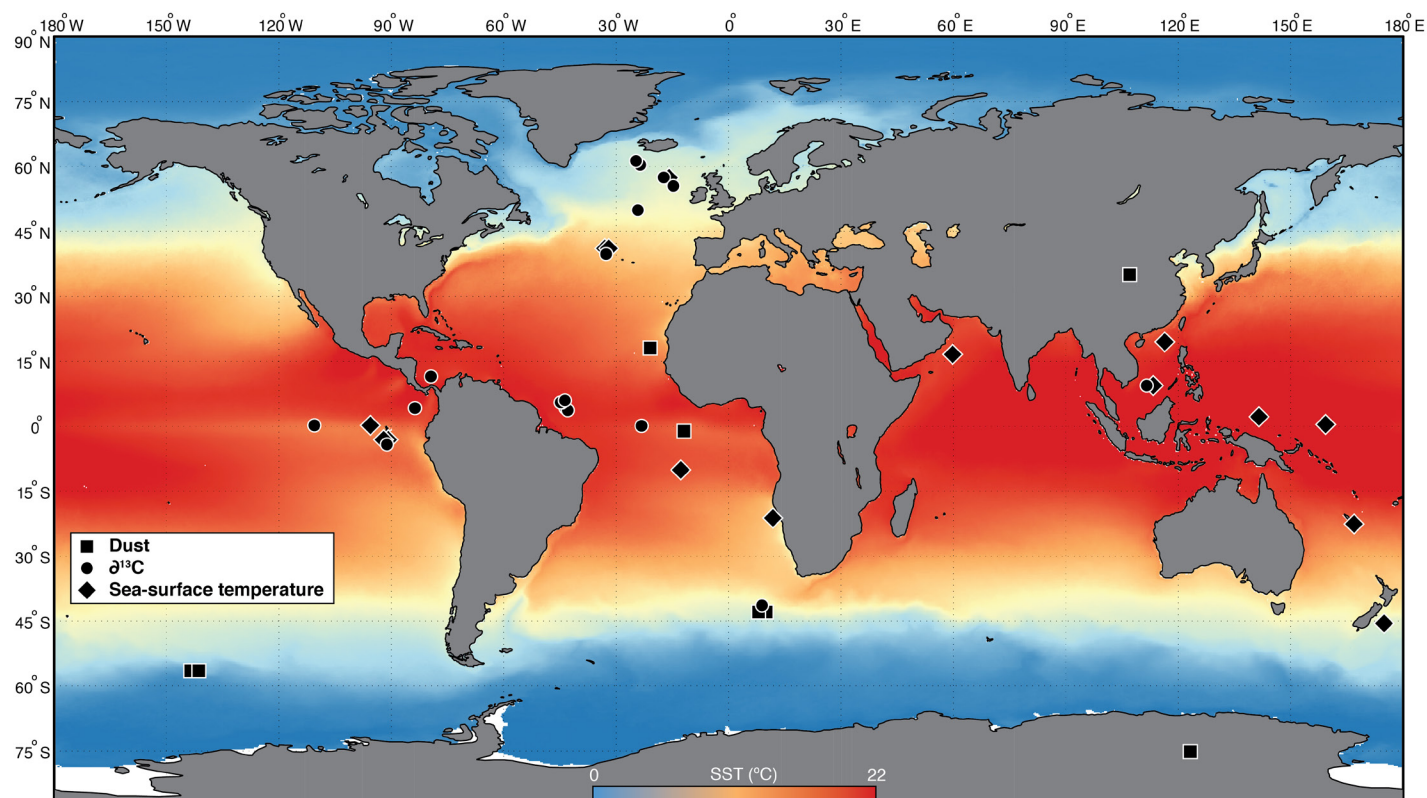

**Figure 2 – Site locations.** Map indicating the locations of the cores used in this research and modern sea-surface temperature values. Each symbol represents a different proxy record. Diamonds – sea-surface temperatures. Circles – benthic  $\delta^{13}\text{C}$ . Squares – dust.

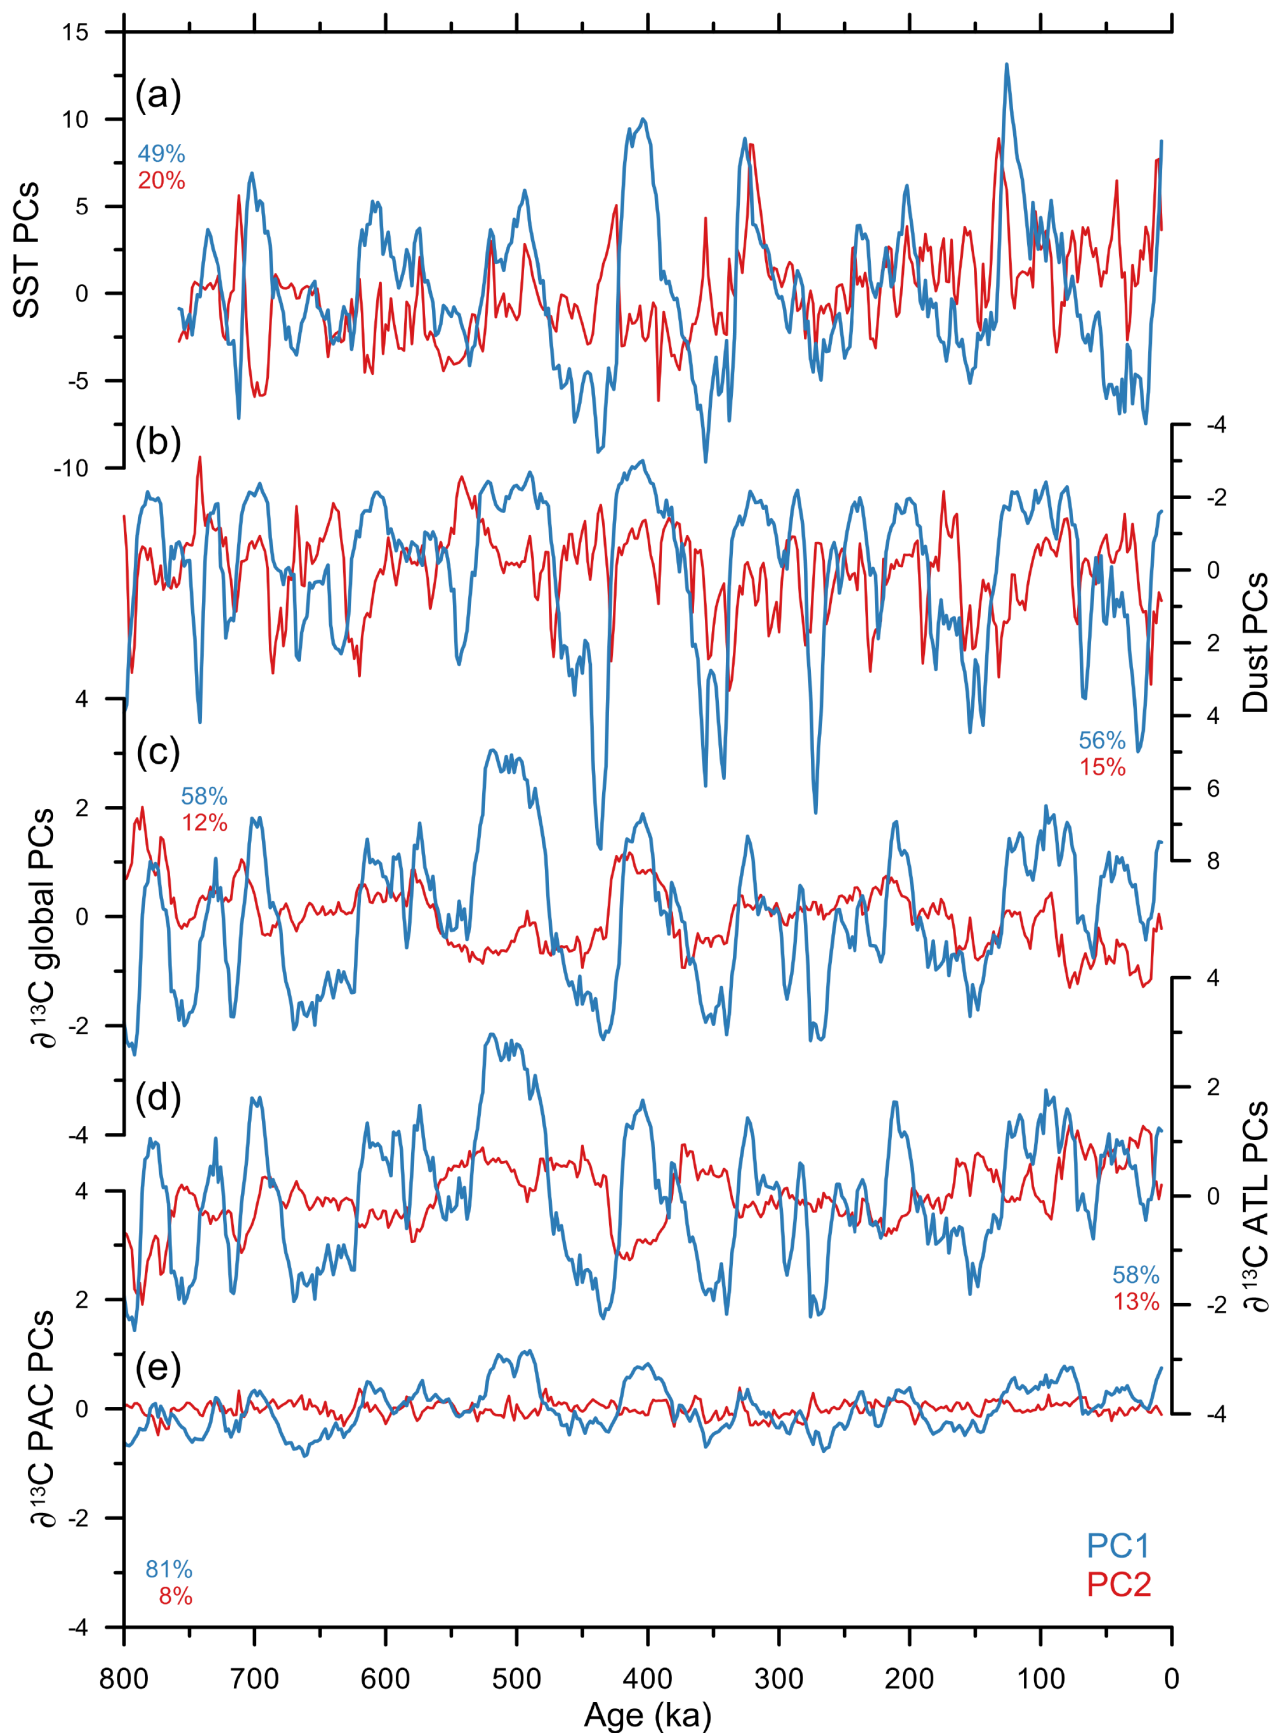

**Figure 3 – Principal components.** Plots of the first (PC1; blue) and second (PC2; red) principal components from our EOF analysis of each climate variable. Percent variance explained by each PC represented by the numbers with the corresponding color. **a**, Sea-surface temperatures. **b**, Dust records. **c**, Global  $\delta^{13}\text{C}$ . **d**,  $\delta^{13}\text{C}$  of the Atlantic. **f**,  $\delta^{13}\text{C}$  of the Pacific.

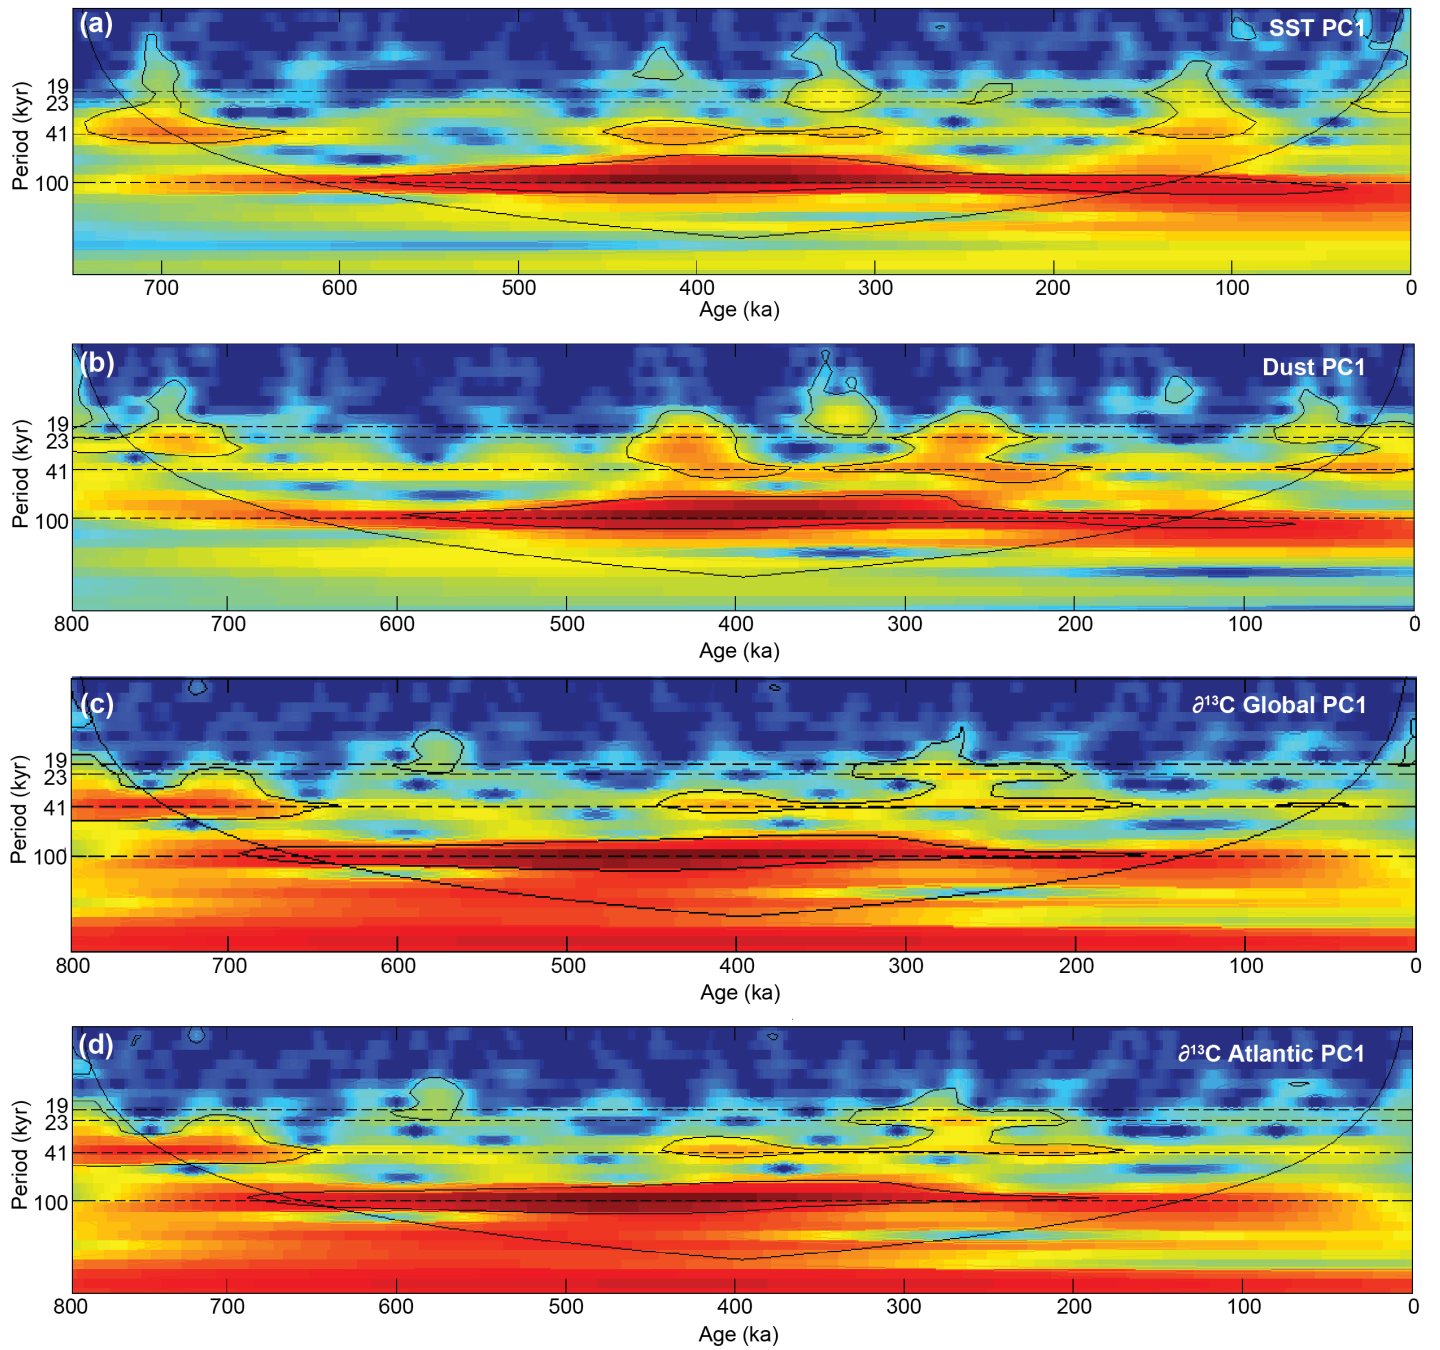

**Figure 4 – Wavelet analysis.** Wavelets of four of the first principal components. **a**, Sea-surface temperatures. **b**, Dust records. **c**, Global  $\delta^{13}\text{C}$ . **d**,  $\delta^{13}\text{C}$  of the Atlantic. Red colors represent higher spectral power. Blue colors represent lower spectral power. Statistical significance highlighted by the thin black line. Milankovitch periods highlighted by the dashed horizontal lines.



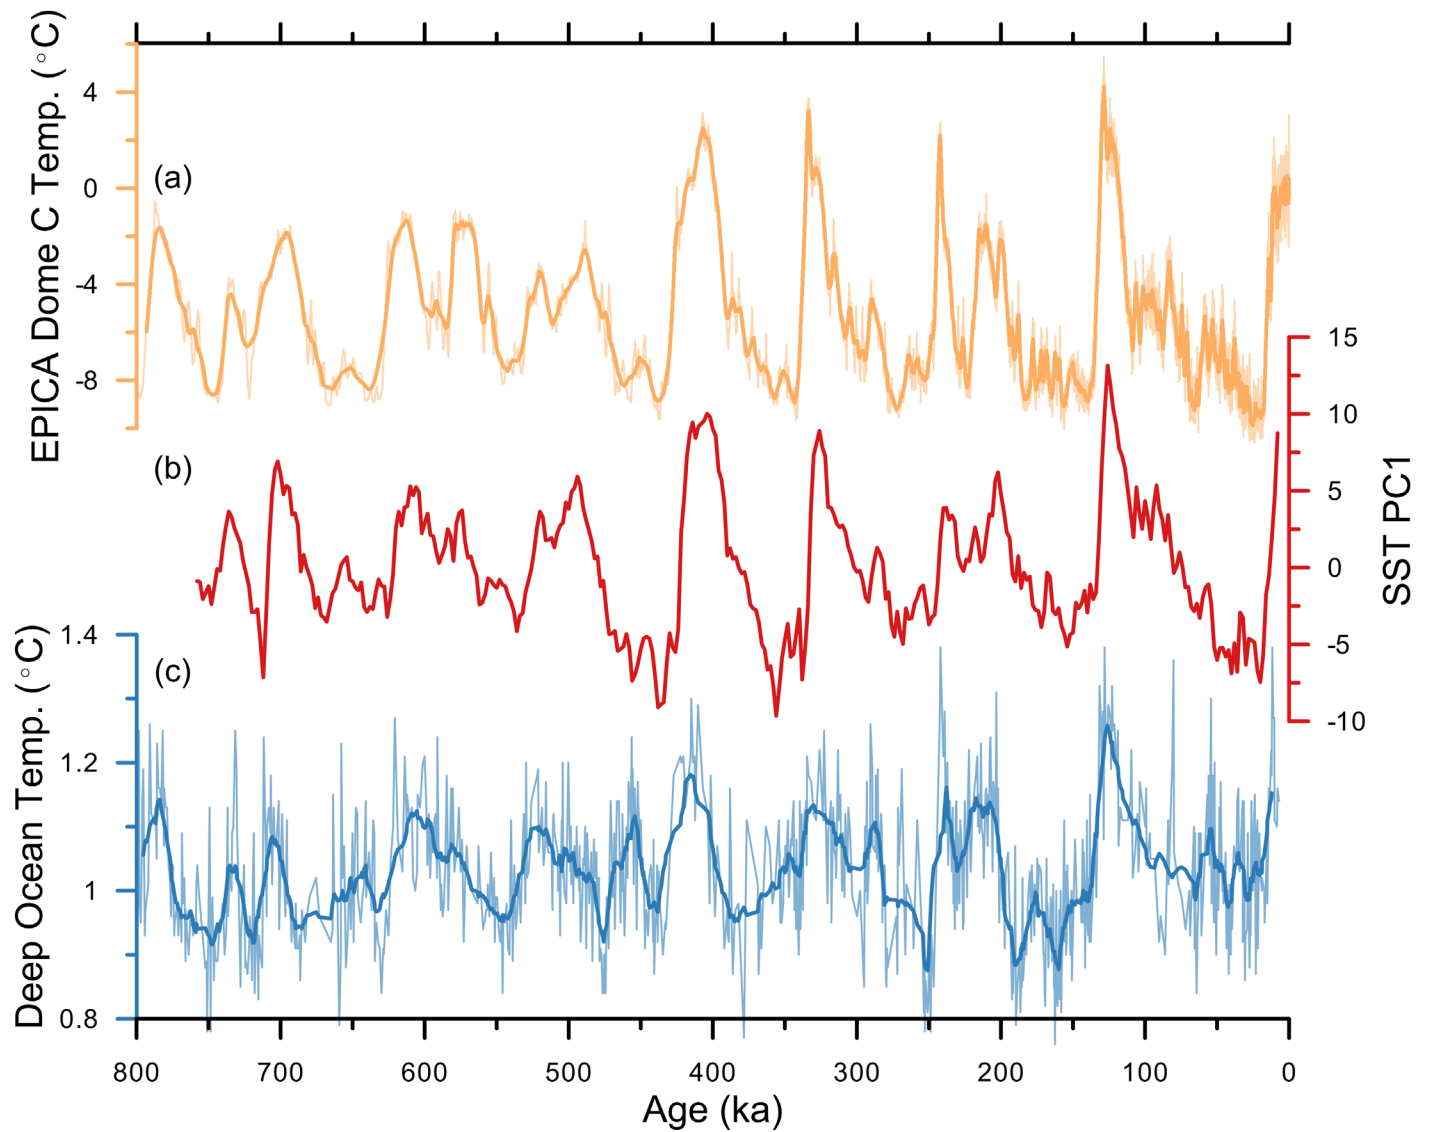

**Figure 5 – Temperature records.** **a**, Deuterium-based temperature record from EPICA Dome C in Antarctica (light yellow; Jouzel et al., 2007). The darker yellow line is a 15-point moving average. **b**, The first principal component of our sea-surface temperature analysis (red). **c**, Bottom water temperature derived from Mg/Ca measurements at ODP 1123 (light blue; Elderfield et al., 2012). Dark blue line is a 15-point moving average.

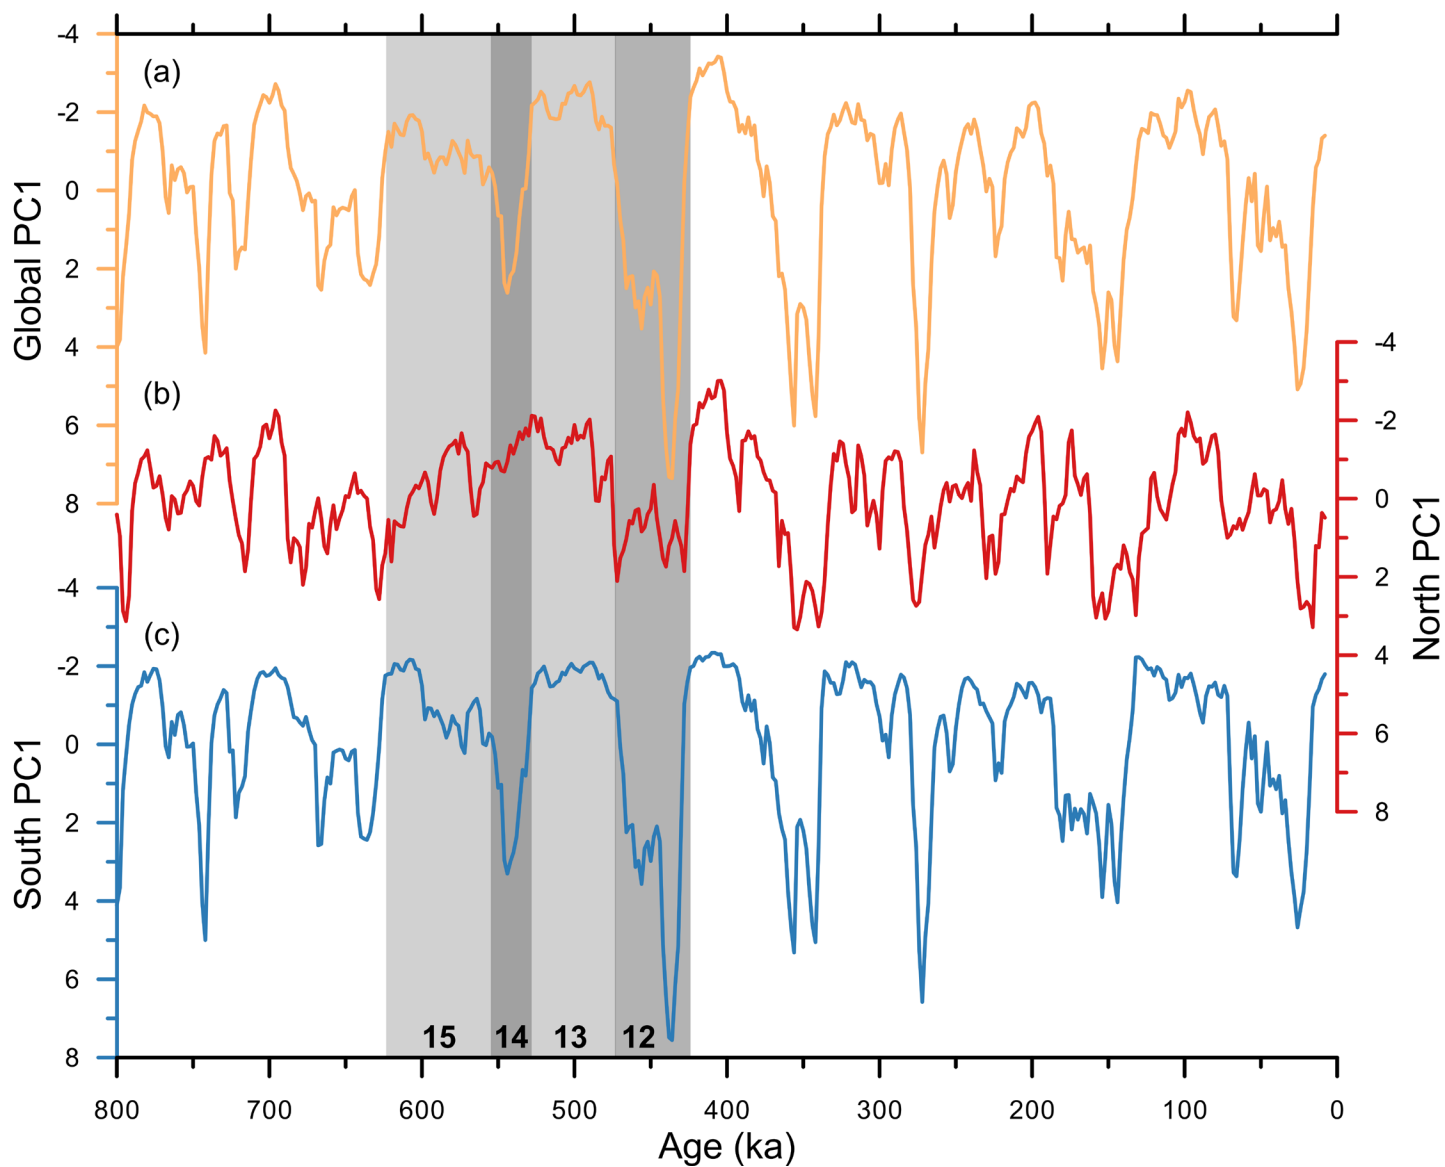

**Figure 6 – Dust principal components.** The first principal components of our dust analysis for the global (yellow), north (red), and south (blue) records. Vertical gray boxes highlight specific glacial (dark gray) and interglacial (light gray) periods. The numbers indicate the associated Marine Isotope Stage of each box.

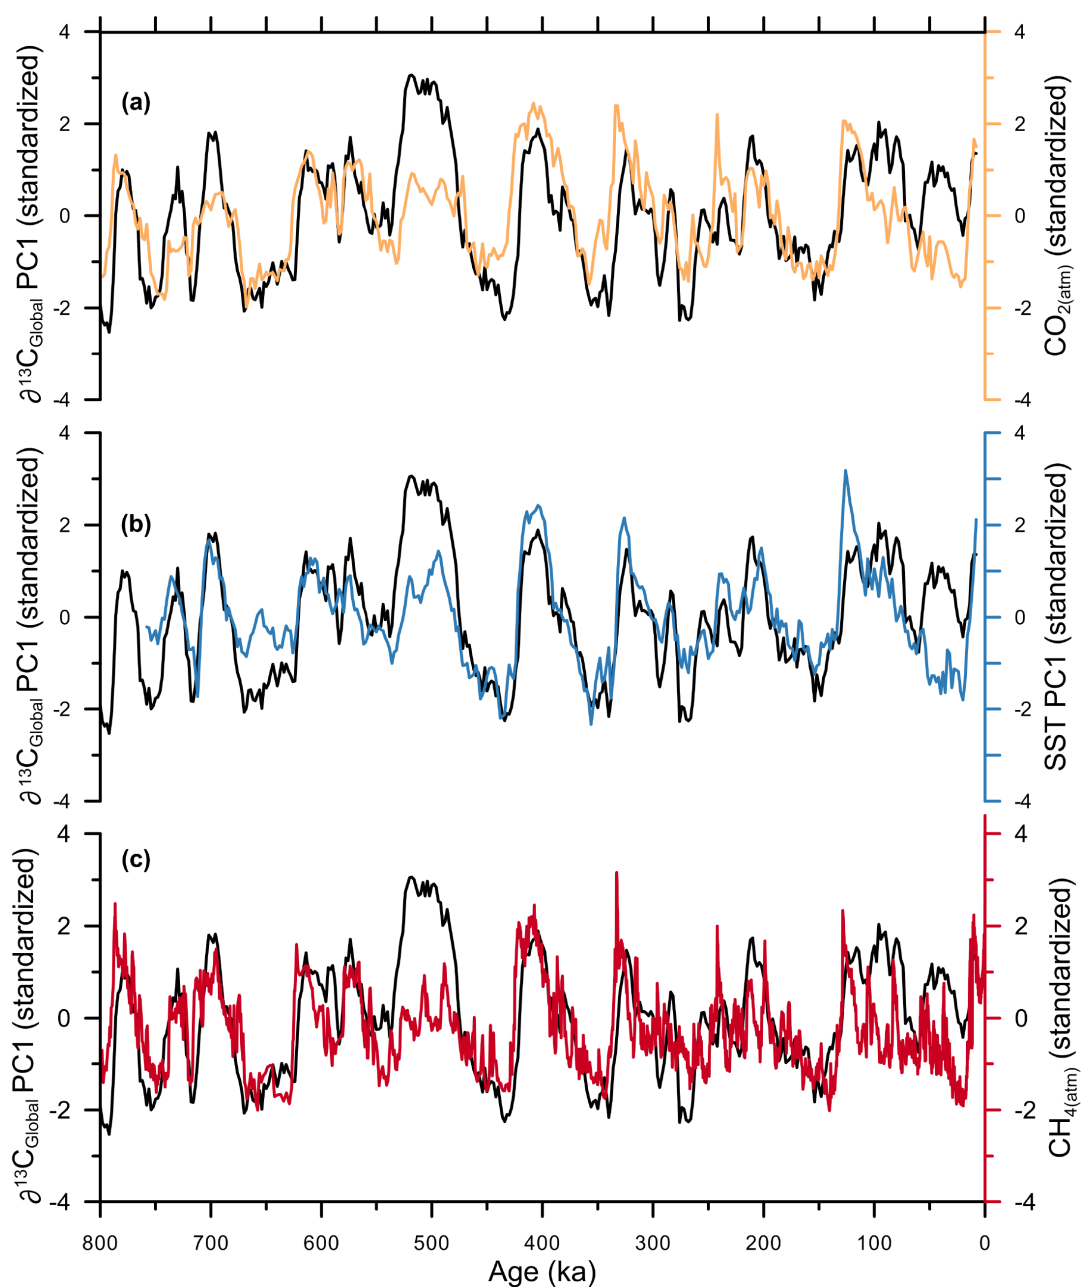

**Figure 7 – Global  $\delta^{13}\text{C}$  proxy comparison.** Comparison of the global  $\delta^{13}\text{C}$  first principal component (PC1; black) compared against **a**, EPICA Dome C  $\text{CO}_2$  (yellow; EPICA community members, 27, Lthi et al., 28), **b**, sea-surface temperature PC1 from this research (blue), and **c**, EPICA Dome C  $\text{CH}_4$  (red; EPICA community members, 2007).

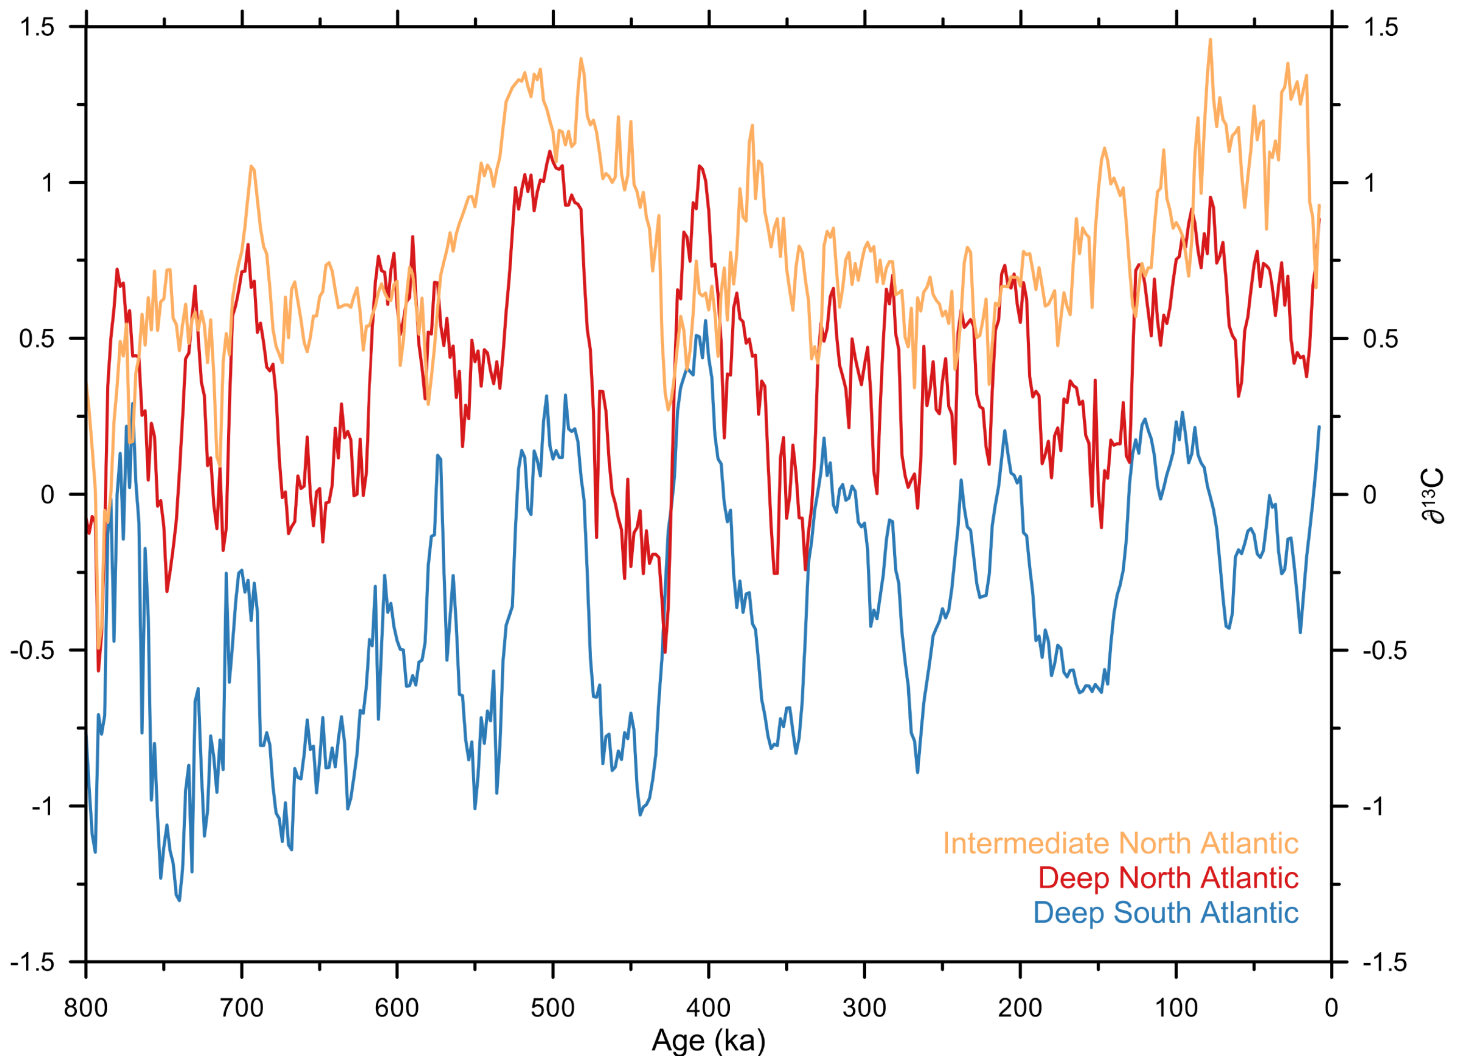

**Figure 8 – Regional  $\delta^{13}\text{C}$  stacks.** Stacked records of benthic  $\delta^{13}\text{C}$  separated into three regions: Intermediate North Atlantic (orange), Deep North Atlantic (red), and Deep South Atlantic (blue). All plots shown in  $\delta^{13}\text{C}$  space to highlight different isotopic values.

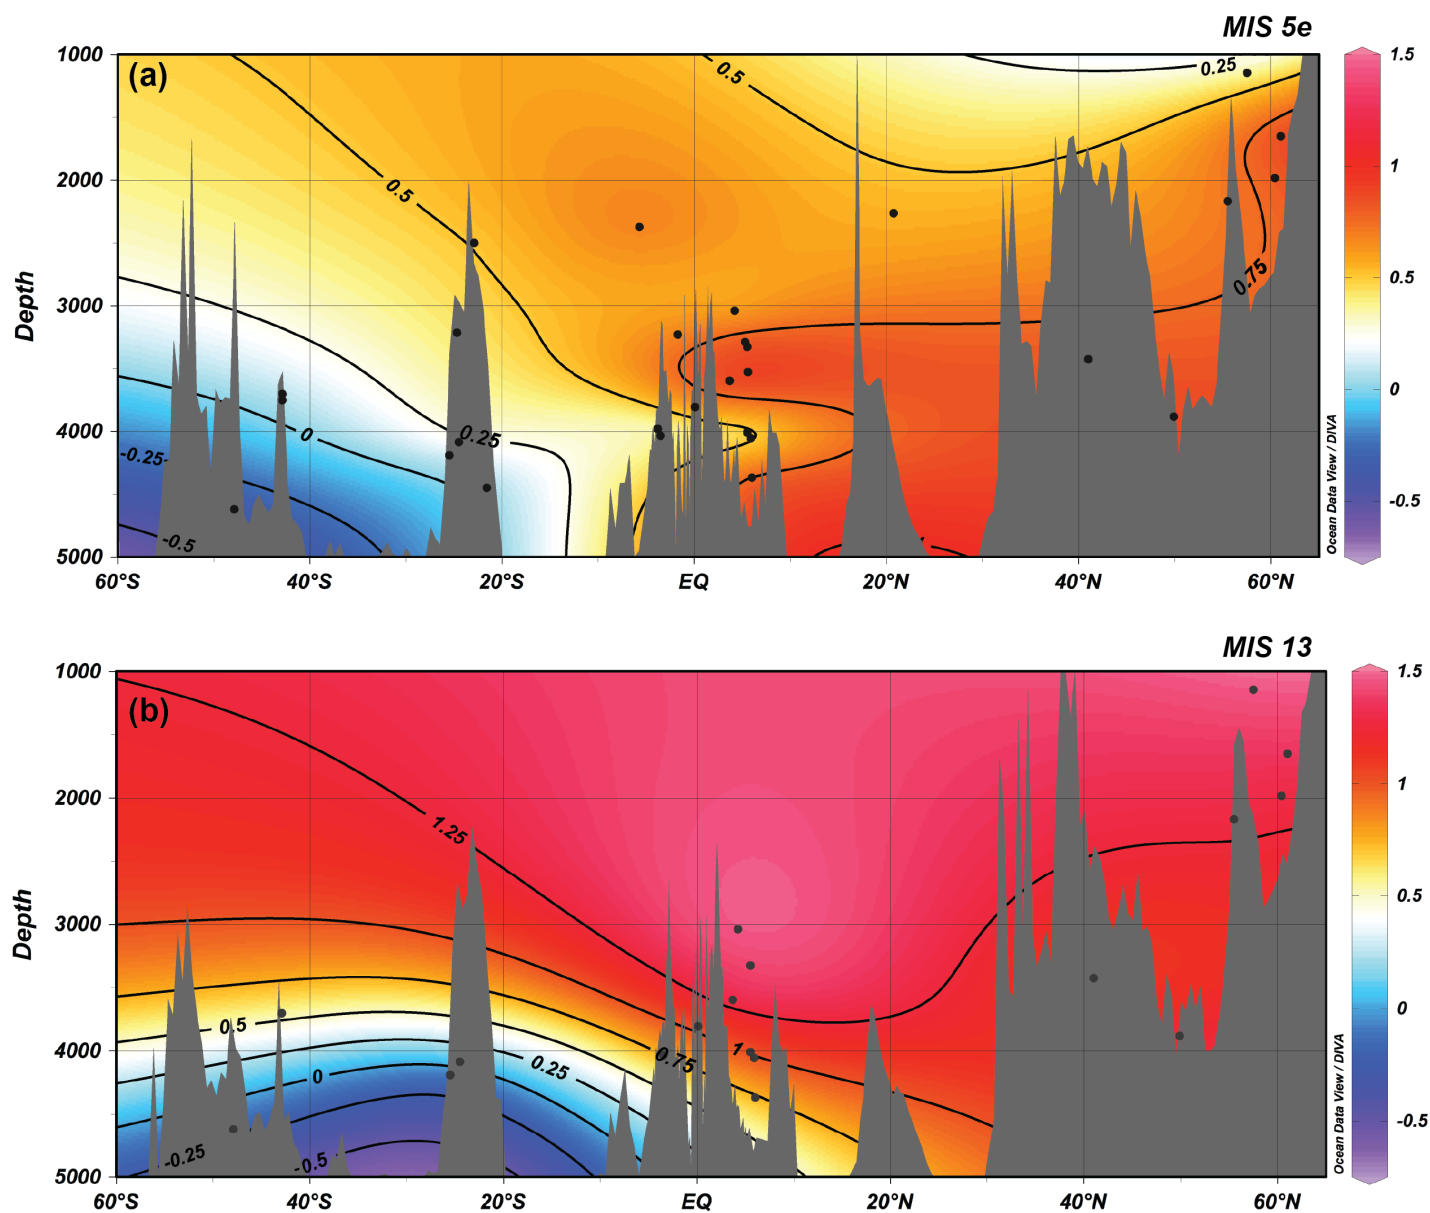

**Figure 9 – MIS 13 and 5e contour plots of  $\delta^{13}\text{C}$ .** Contour plots of the  $\delta^{13}\text{C}$  values in the North Atlantic basin for the interglacials MIS 13 and MIS 5e. Red colors represent more positive, enriched values. Blue colors represent lower, depleted values. Plot created using Ocean Data Viewer.



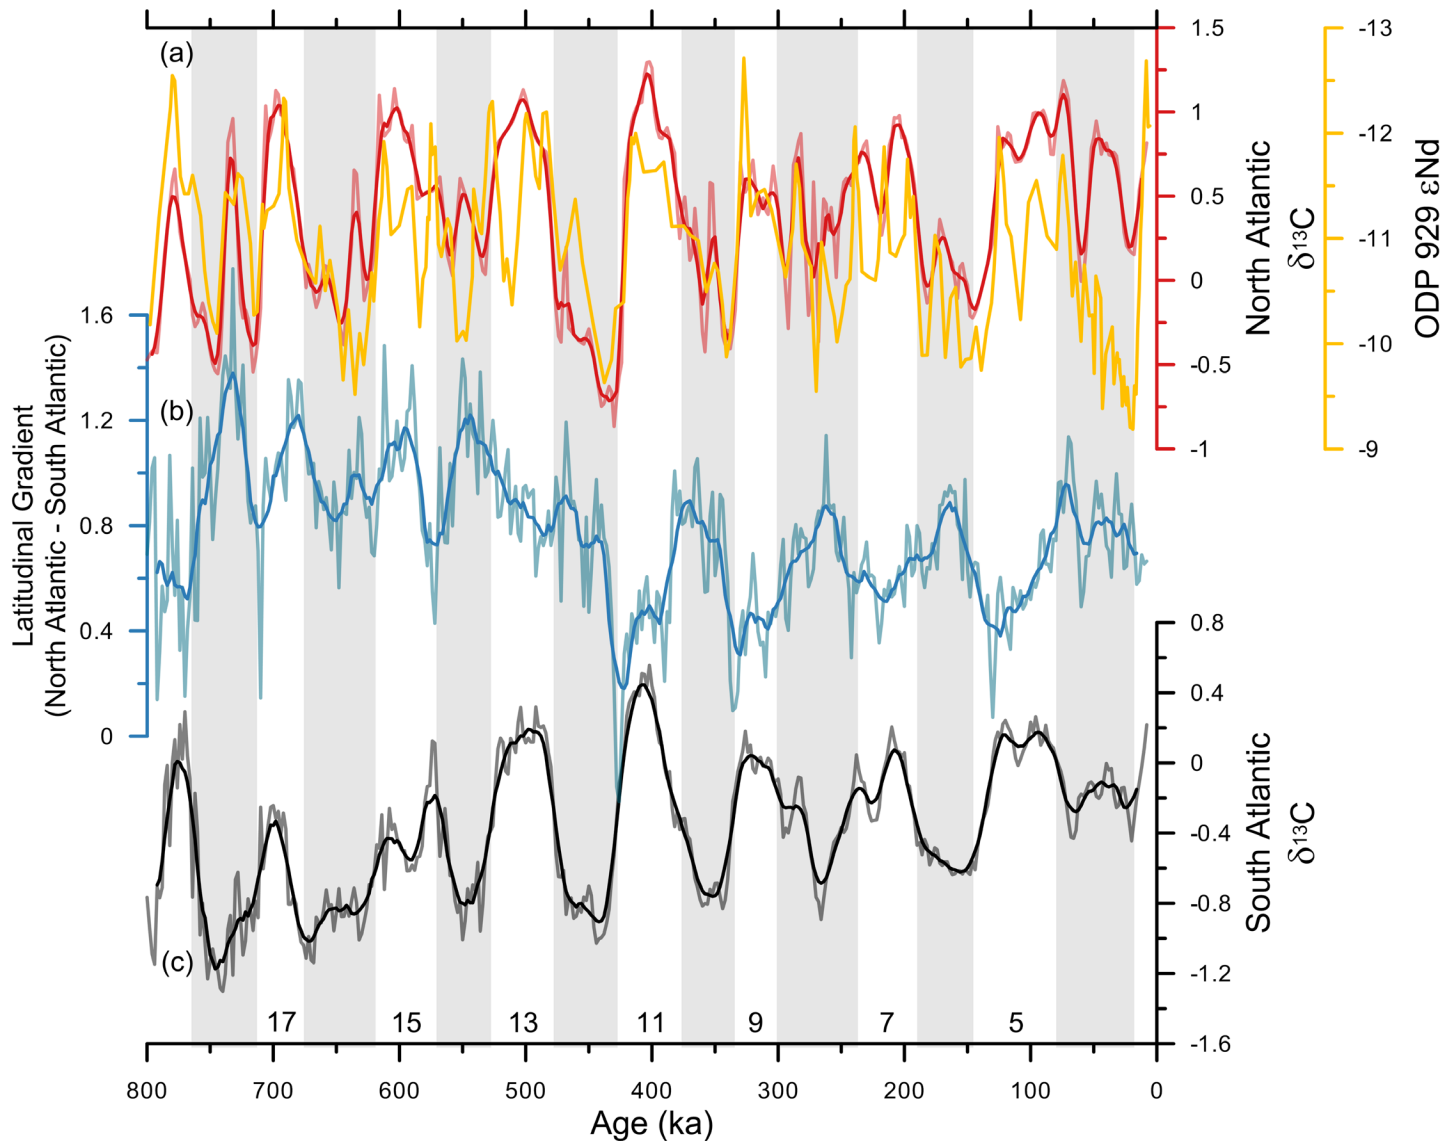

**Figure 10 – Latitudinal  $\delta^{13}\text{C}$  gradient.** **a**, North Atlantic regional  $\delta^{13}\text{C}$  stack plotted in  $\delta^{13}\text{C}$  space (red) authigenic  $\epsilon_{\text{Nd}}$  (yellow; Howe et al., 2017). **b**, Latitudinal gradient of Atlantic  $\delta^{13}\text{C}$  regional stacks (North Atlantic minus South Atlantic; blue). Lower values demonstrate increased similarity between the records. **c**, South Atlantic regional  $\delta^{13}\text{C}$  stack plotted in  $\delta^{13}\text{C}$  space (black). Vertical gray bars indicate glacial periods. Numbers represent Marine Isotope Stage numbers for interglacials.

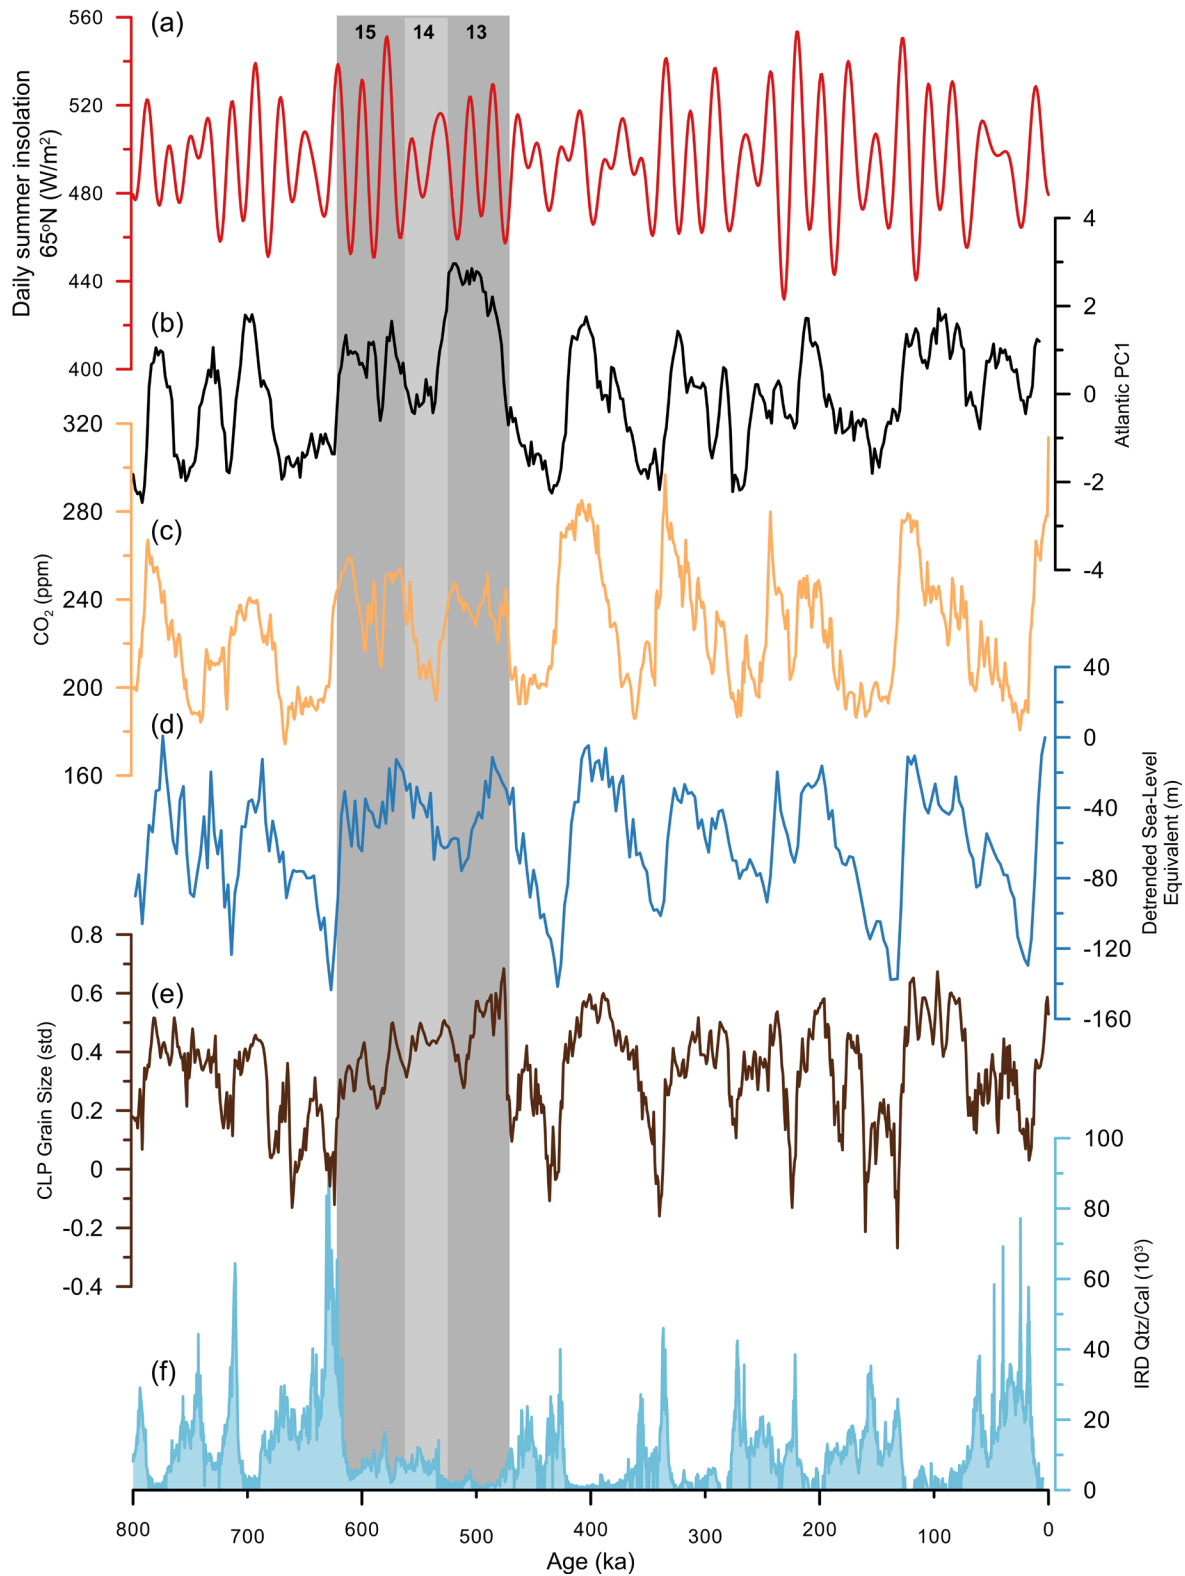

**Figure 11** – Marine isotope stages 15 to 13 and the carbon isotope excursion. **a**, Summer insolation at 65° N (red). **b**, First principal component of Atlantic  $\delta^{13}\text{C}$  (black). **c**, EPICA Dome C  $\text{CO}_2$  (yellow; EPICA community members, 2004, Lüthi et al., 2008). **d**, Detrended sea-level equivalent from Shakun et al., 2015 (blue). Derived from  $\delta^{18}\text{O}_{\text{sw}}$  calculations. Negative numbers indicate lower sea level and increased ice volume. **e**, Chinese Loess Plateau grain size indicating relative Asian summer monsoon strength (brown; Sun et al., 25). **f**, Quartz/Calcite ratios from site U1313 in the North Atlantic as a measure of ice-rafted debris (light blue; Naafs et al., 212). Dark gray bars highlight the interglacials (MIS 15 and MIS 13) between ~630 to ~470 ka. Light gray bar highlights MIS 14.

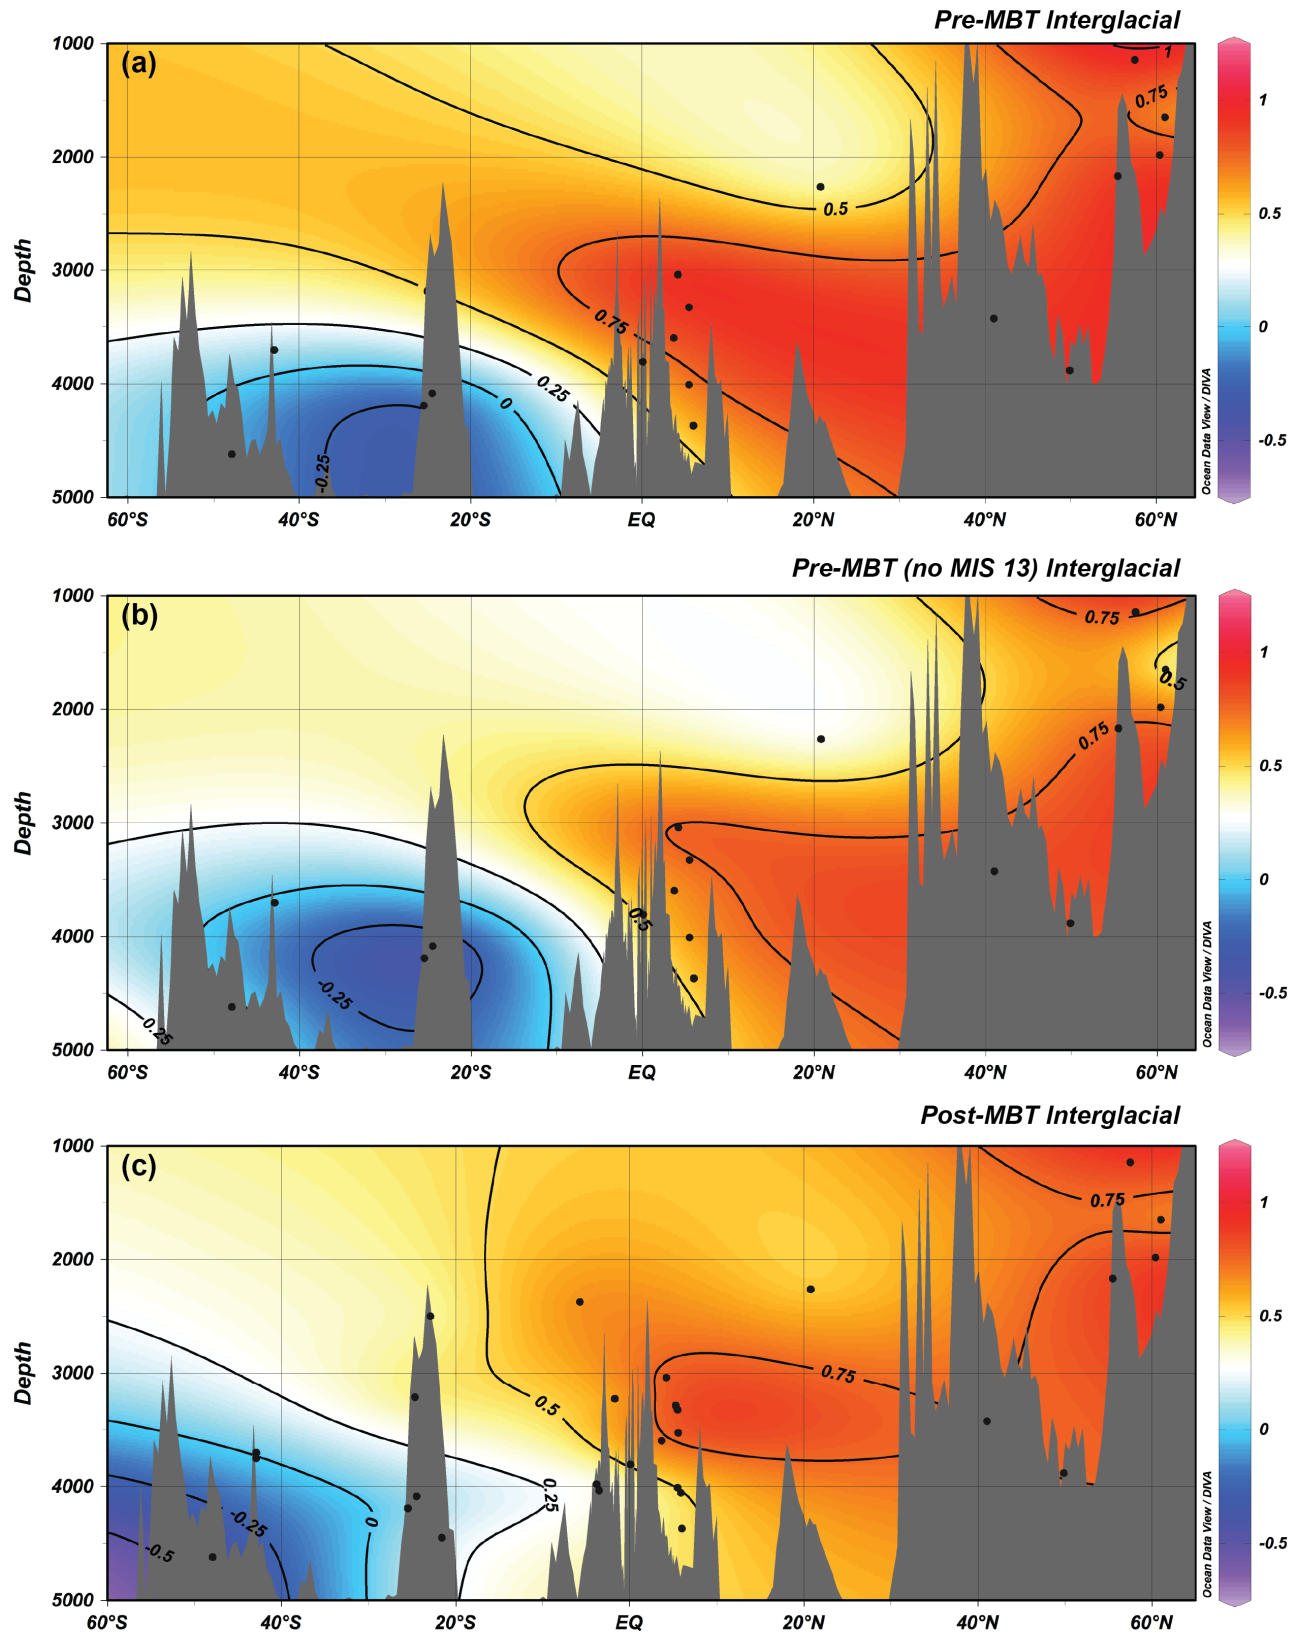

**Figure 12 – Average interglacial  $\delta^{13}\text{C}$  contours.** Contour plots of the average interglacial  $\delta^{13}\text{C}$  values in the Atlantic for **a**, pre-MBT included MIS 13, **b**, pre-MBT excluding MIS 13 (enriched carbon isotope excursion), and **c**, post-MBT. Red colors indicate higher  $\delta^{13}\text{C}$  values. Blue colors indicate lower  $\delta^{13}\text{C}$  values. Boundary between the two water masses (NADW and AABW) indicated at the 0.25‰ contour (Curry and Oppo, 2005).

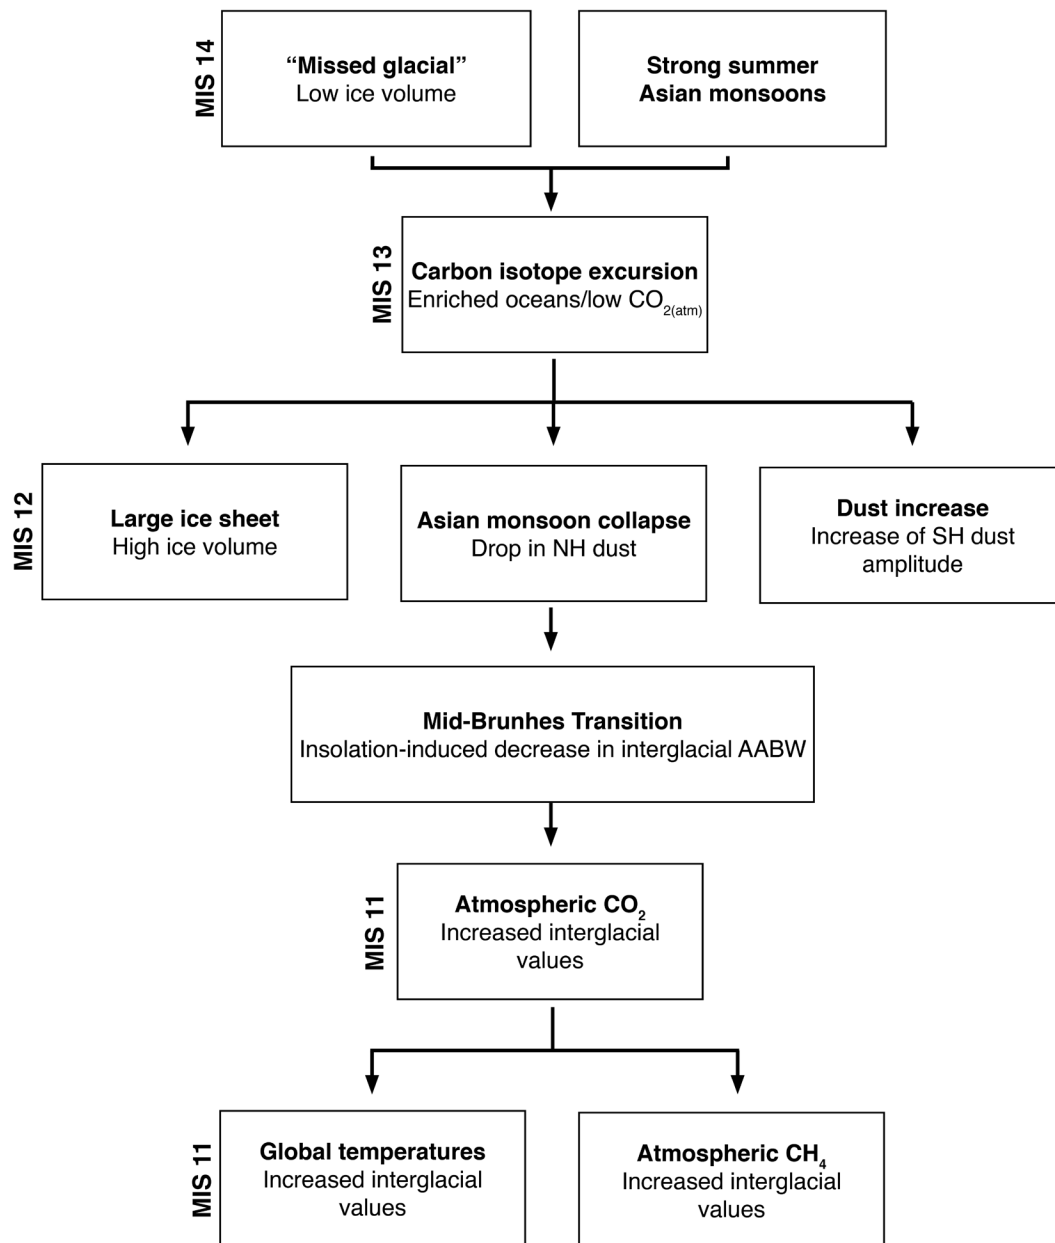

**Figure 13 – Schematic representation of the sequence of events leading to the Mid-Brunhes Transition.** Corresponding marine isotope stages are located on the left side of each row. Boxes in a row indicate synchronous events.

Table 1 - Data compilation

| Core         | Location                    | Latitude | Longitude | $\Delta t$ (ka) | Proxy                   | doi/url                                                                                               | Reference                     |
|--------------|-----------------------------|----------|-----------|-----------------|-------------------------|-------------------------------------------------------------------------------------------------------|-------------------------------|
| DSDP 607     | Northeastern Atlantic       | 41.0012  | -32.9573  | 2.8             | SST - Transfer function | <a href="https://doi.org/10.1594/PANGAEA.701229">https://doi.org/10.1594/PANGAEA.701229</a>           | Ruddiman et al., 1989         |
| ODP 846      | Eastern Equatorial Pacific  | -3.0949  | -90.818   | 2.3             | SST - Uk37              | <a href="https://doi.org/10.1126/science.1185435">https://doi.org/10.1126/science.1185435</a>         | Herbert et al., 2010          |
| ODP 982      | North Atlantic              | 57.5165  | -15.8667  | 4.7             | SST - Uk37              | <a href="https://www.ncdc.noaa.gov/paleo/study/8624">https://www.ncdc.noaa.gov/paleo/study/8624</a>   | Lawrence et al., 2009         |
| ODP 1143     | Western Equatorial Pacific  | 9.3619   | 113.2851  | 1.9             | SST - Uk37              | <a href="https://doi.org/10.1594/PANGAEA.786444">https://doi.org/10.1594/PANGAEA.786444</a>           | Li et al., 2011               |
| ODP 1082     | South Atlantic              | -21.0941 | 11.8205   | 4.5             | SST - Uk37              | <a href="https://doi.org/10.1594/PANGAEA.786701">https://doi.org/10.1594/PANGAEA.786701</a>           | Etourneau et al., 2009        |
| ODP 1313     | North Atlantic              | 41.0011  | -32.9573  | 1.4             | SST - Uk37              | <a href="https://doi.org/10.1594/PANGAEA.744483">https://doi.org/10.1594/PANGAEA.744483</a>           | Naafs et al., 2012            |
| ODP 722      | Arabian Sea                 | 16.6218  | 59.7953   | 2.0             | SST - Uk37              | <a href="https://doi.org/10.1126/science.1185435">https://doi.org/10.1126/science.1185435</a>         | Herbert et al., 2010          |
| ODP 1146     | South China Sea             | 19.4567  | 116.2727  | 1.6             | SST - Uk37              | <a href="https://doi.org/10.1126/science.1185435">https://doi.org/10.1126/science.1185435</a>         | Herbert et al., 2010          |
| ODP 846      | Eastern Equatorial Pacific  | -3.0949  | -90.818   | 1.3             | SST - Uk37              | <a href="https://doi.org/10.1038/nature02338">https://doi.org/10.1038/nature02338</a>                 | Liu and Herbert, 2004         |
| MD97-2140    | Western Pacific Warm Pool   | 2.1792   | 141.4581  | 3.9             | SST - Mg/Ca             | <a href="https://www.ncdc.noaa.gov/paleo/study/6266">https://www.ncdc.noaa.gov/paleo/study/6266</a>   | de Garidel-Thoron, 2005       |
| MD06-3018    | Tropical Western Pacific    | -22.5977 | 166.8628  | 5.2             | SST - Mg/Ca             | <a href="https://www.ncdc.noaa.gov/paleo/study/11188">https://www.ncdc.noaa.gov/paleo/study/11188</a> | Russon et al., 2011           |
| ODP 806      | Western Equatorial Pacific  | 0.319    | 159.361   | 2.4             | SST - Mg/Ca             | <a href="https://doi.org/10.1594/PANGAEA.772015">https://doi.org/10.1594/PANGAEA.772015</a>           | Medina-Elizalde and Lea, 2005 |
| DSDP 594     | Southwest Pacific           | -45.5235 | 174.948   | 2.6             | SST - Modern analog     | <a href="https://doi.org/10.1594/PANGAEA.691478">https://doi.org/10.1594/PANGAEA.691478</a>           | Schaefer et al., 2005         |
| V22-174      | South Atlantic              | -10.0667 | -12.8167  | 4.1             | SST - Transfer function | <a href="https://doi.org/10.1594/PANGAEA.52228">https://doi.org/10.1594/PANGAEA.52228</a>             | Specmap, 1990                 |
| RC13-110     | Eastern Equatorial Pacific  | 0        | -96       | 4.9             | SST - Transfer function |                                                                                                       | Pisias et al., 1997           |
| ODP 659      | Eastern Equatorial Atlantic | 18.0772  | -21.0262  | 3.6             | Dust flux               | <a href="https://doi.org/10.1594/PANGAEA.696121">https://doi.org/10.1594/PANGAEA.696121</a>           | Tiedemann et al., 1994        |
| ODP 1090     | Subantarctic Atlantic       | -42.9137 | 8.8997    | 0.3             | Dust MAR                | <a href="https://doi.org/10.1594/PANGAEA.767460">https://doi.org/10.1594/PANGAEA.767460</a>           | Martinez-Garcia et al., 2011  |
| ODP 1090     | Subantarctic Atlantic       | -42.9137 | 8.8997    | 0.3             | Fe MAR                  | <a href="https://doi.org/10.1594/PANGAEA.767460">https://doi.org/10.1594/PANGAEA.767460</a>           | Martinez-Garcia et al., 2011  |
| CLP          | Chinese Loess Plateau       |          |           | 1.0             | Grain size              | <a href="https://doi.org/10.1029/2006GC001287">https://doi.org/10.1029/2006GC001287</a>               | Sun et al., 2005              |
| Lake Baikal  | Southern Russia             |          |           | 0.5             | Silica %                | <a href="https://www.ncdc.noaa.gov/paleo/study/6068">https://www.ncdc.noaa.gov/paleo/study/6068</a>   | Prokopenko et al., 2006       |
| PS75-074     | Pacific Southern Ocean      | -56.4696 | -142.9954 | 0.4             | Fe counts               | <a href="https://doi.org/10.1594/PANGAEA.826600">https://doi.org/10.1594/PANGAEA.826600</a>           | Lamy et al., 2014             |
| PS75-076     | Pacific Southern Ocean      | -56.4696 | -142.9954 | 0.4             | Fe wt. %                | <a href="https://doi.org/10.1594/PANGAEA.826600">https://doi.org/10.1594/PANGAEA.826600</a>           | Lamy et al., 2014             |
| ODP 663      | Eastern Equatorial Atlantic | -1.1978  | -11.8785  | 2.7             | Terrestrial %           | <a href="https://doi.org/10.1594/PANGAEA.208129">https://doi.org/10.1594/PANGAEA.208129</a>           | deMenocal et al., 1993        |
| EPICA Dome C | Antarctica                  | -75.06   | 123.21    | 0.2             | Dust                    | <a href="https://doi.org/10.1594/PANGAEA.695995">https://doi.org/10.1594/PANGAEA.695995</a>           | Lambert et al., 2008          |
| ODP 982      | North Atlantic              | 57.5     | -15.9     | 2.5             | $\delta^{13}\text{C}$   | <a href="https://doi.org/10.1594/PANGAEA.700897">https://doi.org/10.1594/PANGAEA.700897</a>           | Venz et al., 1999             |
| ODP 983      | North Atlantic              | 60.4     | -23.6     | 1.0             | $\delta^{13}\text{C}$   | <a href="https://www.ncdc.noaa.gov/paleo/study/2543">https://www.ncdc.noaa.gov/paleo/study/2543</a>   | McIntyre et al., 1999         |
| ODP 984      | North Atlantic              | 61       | -24       | 3.5             | $\delta^{13}\text{C}$   | <a href="https://www.ncdc.noaa.gov/paleo/study/5897">https://www.ncdc.noaa.gov/paleo/study/5897</a>   | Raymo et al., 2004            |
| DSDP 607     | North Atlantic              | 41       | -33       | 4.1             | $\delta^{13}\text{C}$   | <a href="https://doi.org/10.1594/PANGAEA.52379">https://doi.org/10.1594/PANGAEA.52379</a>             | Ruddiman et al., 1989         |
| ODP 658      | North Atlantic              | 20.8     | -18.7     | 1.6             | $\delta^{13}\text{C}$   | <a href="https://doi.org/10.1594/PANGAEA.68570">https://doi.org/10.1594/PANGAEA.68570</a>             | Tiedmann et al., 1994         |
| U 1308       | North Atlantic              | 49.9     | -24.2     | 0.3             | $\delta^{13}\text{C}$   | <a href="https://www.ncdc.noaa.gov/paleo/study/10250">https://www.ncdc.noaa.gov/paleo/study/10250</a> | Hodell et al., 2008           |
| ODP 980/981  | North Atlantic              | 55.5     | -14.7     | 1.6             | $\delta^{13}\text{C}$   | <a href="https://doi.org/10.1594/PANGAEA.698998">https://doi.org/10.1594/PANGAEA.698998</a>           | Oppo et al., 1998             |
| DSDP 502     | Equatorial Atlantic         | 11.5     | -79.4     |                 | $\delta^{13}\text{C}$   | <a href="https://doi.org/10.1594/PANGAEA.701470">https://doi.org/10.1594/PANGAEA.701470</a>           | deMenocal et al., 1992        |
| ODP 664      | Equatorial Atlantic         | 0.1      | -23.2     | 3.2             | $\delta^{13}\text{C}$   | <a href="https://www.ncdc.noaa.gov/paleo/study/2529">https://www.ncdc.noaa.gov/paleo/study/2529</a>   | Raymo et al., 1997            |
| ODP 925      | Equatorial Atlantic         | 4.2      | -43.5     | 4.3             | $\delta^{13}\text{C}$   |                                                                                                       | Bickert et al., 1997          |
| ODP 926      | Equatorial Atlantic         | 3.7      | -42.9     | 2.7             | $\delta^{13}\text{C}$   |                                                                                                       | Lisiecki et al., 2008         |
| ODP 927      | Equatorial Atlantic         | 5.5      | -44.5     |                 | $\delta^{13}\text{C}$   |                                                                                                       | Bickert et al., 1997          |
| ODP 929      | Equatorial Atlantic         | 5.5      | -44.5     | 4.9             | $\delta^{13}\text{C}$   |                                                                                                       | Bickert et al., 1997          |
| ODP 928      | Equatorial Atlantic         | 5.5      | -44.8     | 2.5             | $\delta^{13}\text{C}$   |                                                                                                       | Lisiecki et al., 2008         |
| ODP 1090     | South Atlantic              | -42.9    | 8.9       | 2.8             | $\delta^{13}\text{C}$   | <a href="https://doi.org/10.1594/PANGAEA.696106">https://doi.org/10.1594/PANGAEA.696106</a>           | Venz and Hodell, 2002         |
| GeoB 1032    | South Atlantic              | -22.9    | 6         | 3.7             | $\delta^{13}\text{C}$   | <a href="https://doi.org/10.1594/PANGAEA.54655">https://doi.org/10.1594/PANGAEA.54655</a>             | Wefer et al., 1996            |
| GeoB 1035    | South Atlantic              | -21.6    | 5         | 3.9             | $\delta^{13}\text{C}$   | <a href="https://doi.org/10.1594/PANGAEA.58766">https://doi.org/10.1594/PANGAEA.58766</a>             | Bickert and Wefer, 1996       |
| ODP 1089     | South Atlantic              | -47.9    | 9.9       | 0.4             | $\delta^{13}\text{C}$   | <a href="https://doi.org/10.1594/PANGAEA.701432">https://doi.org/10.1594/PANGAEA.701432</a>           | Hodell et al., 2003           |
| GeoB 1211    | South Atlantic              | -24.5    | 7.5       | 4.9             | $\delta^{13}\text{C}$   | <a href="https://doi.org/10.1594/PANGAEA.103634">https://doi.org/10.1594/PANGAEA.103634</a>           | Bickert and Wefer, 1996       |
| GeoB 1214    | South Atlantic              | -24.7    | 7.2       | 4.5             | $\delta^{13}\text{C}$   | <a href="https://doi.org/10.1594/PANGAEA.103635">https://doi.org/10.1594/PANGAEA.103635</a>           | Bickert and Wefer, 1996       |
| RC13-229     | South Atlantic              | -25.5    | 11.3      | 3.8             | $\delta^{13}\text{C}$   | <a href="https://doi.org/10.1594/PANGAEA.701361">https://doi.org/10.1594/PANGAEA.701361</a>           | Oppo et al., 1990             |
| TN 576       | South Atlantic              | -42.9    | 8.9       | 1.5             | $\delta^{13}\text{C}$   | <a href="https://www.ncdc.noaa.gov/paleo/study/2576">https://www.ncdc.noaa.gov/paleo/study/2576</a>   | Hodell et al., 2000           |
| ODP 1143     | Pacific                     | 9.4      | -246.7    | 3.8             | $\delta^{13}\text{C}$   | <a href="https://doi.org/10.1594/PANGAEA.784150">https://doi.org/10.1594/PANGAEA.784150</a>           | Cheng et al., 2004            |
| ODP 677      | Pacific                     | 4.2      | -83.7     | 2.8             | $\delta^{13}\text{C}$   | <a href="https://doi.org/10.1594/PANGAEA.701316">https://doi.org/10.1594/PANGAEA.701316</a>           | Shackleton et al., 1990       |
| ODP 846      | Pacific                     | -3.1     | -90.8     | 2.2             | $\delta^{13}\text{C}$   | <a href="https://doi.org/10.1594/PANGAEA.808207">https://doi.org/10.1594/PANGAEA.808207</a>           | Mix et al., 1995              |
| ODP 849      | Pacific                     | 0.2      | -110.5    | 3.5             | $\delta^{13}\text{C}$   | <a href="https://doi.org/10.1594/PANGAEA.701400">https://doi.org/10.1594/PANGAEA.701400</a>           | Mix et al., 1995              |
| ODP 1123     | Southwest Pacific           | -41.7862 | -171.499  | 0.8             | Mg/Ca                   | <a href="https://doi.org/10.1594/PANGAEA.786205">https://doi.org/10.1594/PANGAEA.786205</a>           | Elderfield et al., 2012       |
| EPICA Dome C | Antarctica                  | -75.06   | 123.21    | 0.4             | CH <sub>4</sub>         | <a href="https://www.ncdc.noaa.gov/paleo/study/6093">https://www.ncdc.noaa.gov/paleo/study/6093</a>   | Loulergue et al., 2008        |
| EPICA Dome C | Antarctica                  | -75.06   | 123.21    | 0.4             | CO <sub>2</sub>         | <a href="https://www.ncdc.noaa.gov/paleo/study/6091">https://www.ncdc.noaa.gov/paleo/study/6091</a>   | Luthi et al., 2008            |
| EPICA Dome C | Antarctica                  | -75.06   | 123.21    | 3.0             | Deuterium               | <a href="https://www.ncdc.noaa.gov/paleo/study/6080">https://www.ncdc.noaa.gov/paleo/study/6080</a>   | EPICA Community Members, 2004 |
