# Supplementary material for: Climate evolution across the Mid-Brunhes Transition
Source: Copernicus journal article supplement (doi:10.5194/cp-2018-20), 2018-03-27
Supplement: Supplementary file [file cp-2018-20-AC2-supplement.zip]

# Climate evolution across the Mid-Brunhes Transition

Aaron M. Barth<sup>1,2\*</sup>, Peter U. Clark<sup>1</sup>, Nicholas S. Bill<sup>1</sup>, Feng He<sup>1,3</sup>, Nicklas G. Pias<sup>1</sup>

<sup>1</sup>College of Earth, Ocean, and Atmospheric Sciences, Oregon State University, Corvallis, OR 97331, USA

<sup>2</sup>Department of Geoscience, University of Wisconsin – Madison, Madison, WI 53706, USA

5 <sup>3</sup>Center for Climatic Research, Nelson Institute for Environmental Studies, University of Wisconsin – Madison, Madison, WI 53706, USA

*Correspondence to:* Aaron M. Barth (a Barth2@wisc.edu)

**Abstract.** The Mid-Brunhes Transition (MBT) began ~430 ka with an increase in the amplitude of the 100-kyr climate cycles of the past 800,000 years. The MBT has been identified in ice-core records, which indicate interglaciations became warmer with higher atmospheric CO<sub>2</sub> levels after the MBT, and benthic oxygen isotope (δ<sup>18</sup>O) records, which suggest that post-MBT interglaciations had higher sea levels [and warmer temperatures](#) than pre-MBT interglaciations. It remains unclear, however, whether the MBT was a globally synchronous phenomenon that included other components of the climate system. Here we further characterize changes in the climate system across the MBT through statistical analyses of ice-core and δ<sup>18</sup>O records as well as sea-surface temperature, benthic carbon isotope, and dust accumulation records. Our results demonstrate that the MBT was a global event with a significant increase in climate variance in most components of the climate system assessed here. However, our results indicate that the onset of high-amplitude variability in temperature, atmospheric CO<sub>2</sub>, and sea level at ~430 ka was preceded by changes in the carbon cycle, ice sheets, and monsoon strength during MIS 14 and 13.

## 20 1 Introduction

The last 800 kyr of the Pleistocene epoch is characterized by the emergence of dominant ~100-kyr glacial-interglacial climate cycles (Pias and Moore, 1981; Imbrie et al., 1993; Raymo et al., 1997; Clark et al., 2006). These climate cycles typically have long glacial periods punctuated by short interglaciations. Since ~430 ka (i.e., starting with Marine Isotope Stage (MIS) 11), interglaciations have experienced warmer temperatures (Jouzel et al., 2007) and higher concentrations of atmospheric CO<sub>2</sub> (Luthi et al., 2008) relative to earlier interglaciations of the last 800 kyr (Figure 1). The transition to higher amplitude interglaciations has also been recognized in deep-sea records of δ<sup>18</sup>O measured in benthic foraminifera (Lisiecki and Raymo, 2005) that identify lesser ice volume and/or warmer deep-ocean temperatures (Figure 1).

Jansen et al. (1986) originally described this change in amplitude of interglaciations as a singular Mid-Brunhes Event, but Yin (2013) argued that it is more appropriately considered as a transition between two distinct climate states, thus referring to it as the Mid-Brunhes Transition (MBT). The change from low-amplitude to high-amplitude 100-kyr variability at ~430 ka occurs during an interval of reduced eccentricity and corresponding precession (Figure 1), but similar orbital forcing occurred at times before and after the onset of the MBT with no comparable response, suggesting that the MBT was an unforced change internal to the climate system. Mechanisms proposed for the MBT include a latitudinal shift in the position of the Southern Hemisphere westerlies that increased upwelling of respired carbon in the post-MBT Southern Ocean (Kemp et al., 2010), and a change in Antarctic Bottom Water (AABW) formation through insolation-induced feedbacks on sea ice and surface water density (Yin, 2013). However, several questions remain. (1) How and when was the MBT expressed in other components of the climate system? (2) Was the MBT a global or regional transition? (3) Did components expressing a transition change synchronously? Here we address these questions by providing a statistical characterization of changes occurring over the last 800 kyr as recorded by a variety of paleoclimatic proxies with broad spatial coverage.

## 2 Methods

### 2.1 Data collection

We compiled all available published records of sea-surface temperature (SST), benthic marine carbon isotopes ratios ( $\delta^{13\text{C}}$ ), and dust accumulation (Dust) that met our selection criteria and closely represented a global distribution as attainable (Figure 2). Each data set has an average temporal resolution of <5 kyr, does not include any large age gaps, and spans much or all of the entire time period of consideration to limit biasing of the younger parts of the record. Lisiecki (2014) placed all of the  $\delta^{13\text{C}}$  records on the LR04 age model. Published SST records that were not on the LR04 age model were placed on it in one of two ways. If the original data had depth and benthic  $\delta^{18\text{O}}$  data, the SST record was placed on LR04 using the ager script in MATLAB as part of the ARAND software package (Howell et al., 2006). When only benthic  $\delta^{18\text{O}}$  records were available, the SST records were placed on LR04 by selecting corresponding tie points in the  $\delta^{18\text{O}}$  data series using the AnalySeries version 2.0 software (Paillard et al., 1996). Because some dust records could not be placed on the LR04 age model, certain statistical analyses of them (e.g., phase/lag relationships) are likely not robust, but the overall variance in them is preserved. Each record was then interpolated to a time step ( $\Delta t$ ) of 2 kyr. With each record having an average resolution <5 kyr, this  $\Delta t$  allows for the preservation of higher frequency variability while limiting the number of interpolated data points.

We used empirical orthogonal function analysis (EOF) to characterize the dominant modes of variability and robustly demonstrate global and regional signals of the SST,  $\delta^{13}\text{C}$ , and dust records. We then used spectral analyses of each resulting principal component (PC) to characterize their periodicity, phase, and amplitude.

60

## 2.2 Sea-surface temperatures

We used 11 SST records that span the entire 800-kyr time period, and four additional records that span 8 – 758 ka. Inclusion of these four shorter records does not change our conclusions. The SST records cover the Pacific ( $n = 9$ ), Atlantic ( $n = 5$ ), and Indian ( $n = 1$ ) Oceans (Figure 2, Table S1). We note that Shakun et al. (2015) reconstructed a global SST stack for the last 800 kyr using 49 records, but only seven of these spanned the entire 800 kyr. Comparison of our SST PC1 based on 15 records to the Shakun SST stack shows excellent agreement (Fig. S1).

65

## 2.3 Carbon isotopes ( $\delta^{13}\text{C}$ )

We analyzed the global set of  $\delta^{13}\text{C}$  records compiled by Lisiecki (2014) ( $n = 1826$ ; Figure 2), and separately analyzed the records in the Atlantic ( $n = 14$ ) and the Pacific ( $n = 4$ ) basins, thus distinguishing between the dominant water masses within each basin and removing the muting effect of the more negative Pacific values on the more positive Atlantic. Similar to SSTs, Lisiecki (2014) reconstructed a global  $\delta^{13}\text{C}$  stack for the last 3 Myr using 46 records, but only 18 of these spanned the last 800 kyr. Comparison of our  $\delta^{13}\text{C}$  PC1 to the Lisiecki  $\delta^{13}\text{C}$  stack shows excellent agreement (Fig. S2).

70

We then looked at regional and depth stacks of the  $\delta^{13}\text{C}$  records in the Atlantic basin to characterize changes in the dominant water masses on orbital time scales. Regional stacks were broken into North Atlantic ( $> 20^\circ \text{N}$ ;  $n = 4$ ), equatorial Atlantic ( $20^\circ \text{S}$  to  $20^\circ \text{N}$ ;  $n = 14$ ), and South Atlantic ( $> 20^\circ \text{S}$ ;  $n = 8$ ). We also created stacks for the deep North Atlantic (depth  $> 2000 \text{ m}$ ;  $n = 4$ ) and intermediate North Atlantic (depth  $< 2000 \text{ m}$ ;  $n = 3$ ). All included records were averaged to create the stack and each stacked record was interpolated to a 2-kyr-time step. Stacking improves the signal-to-noise ratio of the  $\delta^{13}\text{C}$  records, making regional stacks useful in identifying circulation changes and comparing circulation responses with other climate records (Lisiecki, 2014).

75

80

## 2.4 Dust

We analyzed eight proxy records of dust that span the entire 800-kyr time period, and then separated them by hemisphere (Northern = 3, Southern = 5) to characterize hemispheric differences (Figure 2). The various proxies for dust include Fe mass accumulation rates, weight percent of terrigenous material and Fe, flux of lithogenic grains, and grain size analysis. We

85

standardized each record before analysis to account for these various proxy types and their differing range in values, thus allowing for comparison of their relative amplitudes of variation.

## **2.5 Empirical Orthogonal Function analysis (EOF)**

We used EOF analysis to objectively characterize the climate variability recorded by the proxies across the MBT. The records for SST and  $\delta^{13}\text{C}$  were kept in their original values of degrees and per mil, respectively, to preserve the original variance. Dust records were standardized to a mean value of zero and unit variance so that each record provided equal weight to the EOF. Statistical significance of all EOFs was determined through segmented linear regression analysis. All resulting break points occur on or after the second EOF and are thus considered significant.

## **2.6 Spectral analysis**

We used the Blackman-Tukey technique in the ARAND software package for spectral analysis of each PC. Multiple tests were conducted for the time slices 8-800 ka, 450-800 ka, and 8-350 ka. These intervals characterize the dominant frequency of variability over the entire 800-kyr record, and for the pre- and post-MBT intervals, respectively. The removal of the 350-450 ka interval limited the influence of MIS 11, MIS 12, and Termination V (T5) as these were shown to potentially bias the spectral power. Furthermore, these selected intervals result in time series of equal length to limit biasing of longer records. Additional tests were conducted using wavelet analyses that characterize the change in spectral power as a time series. Complementary spectral analyses were conducted on  $\text{CO}_2$  and  $\text{CH}_4$  records from the EPICA Dome C ice core (EPICA-community-members, 2004; Jouzel et al., 2007), and benthic  $\delta^{18}\text{O}$  using the LR04 stack (Lisiecki and Raymo, 2005). Cross-spectral analyses were conducted for the PCs against mean insolation values to determine phase and coherency of each. Mean insolation values were calculated for each of the dominant periodicities (eccentricity, obliquity, and precession) with the data derived from AnalySeries (Laskar et al., 2004; Paillard et al., 1996).

## **2.7 Variance tests**

We used f-tests to test for variance changes across the MBT for each principal component from the EOF analysis as well as for  $\text{CO}_2$ ,  $\text{CH}_4$ , and the LR04  $\delta^{18}\text{O}$  records. This approach assumes the null hypothesis that the pre- and post-MBT distributions of the time series of each climate component have the same normally distributed variance. If the resulting variance values reject this hypothesis of no statistical difference, then the pre- and post-MBT time series are determined to have undergone a significant

change in variance across the MBT. We interpret the change in variance to reflect a change in the amplitude of each climate  
115 signal.

### 3 Results

#### 3.1 CO<sub>2</sub>, CH<sub>4</sub>, and benthic $\delta^{18}\text{O}$

Time series of the greenhouse gases CO<sub>2</sub> and CH<sub>4</sub> and of the LR04 stack of benthic  $\delta^{18}\text{O}$  suggest an increase in their interglacial  
120 values across the MBT (Figure 1). Spectral analyses of the LR04 stack and atmospheric CO<sub>2</sub> indicate a small post-MBT increase  
in the 100-kyr band, whereas results for CH<sub>4</sub> indicate a decrease (Figure S3). All three records show an increase in the  
precessional band (19-23 kyr). Variance tests suggest that  $\delta^{18}\text{O}$  and CO<sub>2</sub> have a statistically significant increase in variance  
across the MBT while CH<sub>4</sub> variance decreases (Table S2S1).

#### 125 3.2 Sea-surface temperatures

EOF analysis of global SSTs over the last 758 kyr identifies two statistically significant principal components (Figure 4a3a). The  
first and second principal components (PC1 and PC2, respectively) account for 69% of the total variance with PC1 explaining  
49% alone. While some degree of regional variability in each record exists, Factor loadings indicate that each record positively  
contributed to PC1 with a larger contribution coming from high-latitude records. Thus, PC1 is representative of a global SST  
130 signal. SST PC1 demonstrates a stepwise increase in variance starting at 436 ka, with an increase of interglacial temperatures  
while showing no significant change in the lower limit glacial values, which is one of the defining characteristics of the MBT.  
The highest spectral density is in the 100-kyr-frequency band throughout the entire time period (Figure S3d). Wavelet analysis  
(Figure 45a) shows a significant increase in the 100-kyr-frequency band 580 ka that reaches its maximum spectral power during  
MIS 11 and persists throughout most of the remaining interval, albeit with decreasing intensity after ~250 ka. Variance f-tests  
135 reveal a significant increase in amplitude from the pre- to post-MBT SSTs (Table S12). These results thus confirm that there was  
a stepwise global transition of SSTs from lower to higher amplitude interglaciations as previously inferred from individual  
records.

Variance calculations on proxies of bottom water temperature (Elderfield et al., 2012) and on the Antarctic EPICA ice-core  
140 deuterium record (EPICA-community-members, 2004), a measure of Antarctic atmospheric temperature, also indicate  
statistically significant increases in variance across the MBT (Table S12). In both proxies, the time series indicate an increase of

interglacial temperature values while showing no significant change to the lower limit glacial values, similar to PC1 of SSTs (Figure 56).

### 3.3 Dust

The EOF analysis of the global dust records identifies two statistically significant principal components with PC1 representing 56% of the total variance and PC2 15% (Figure 4b3b). All records but the one from the Chinese Loess Plateau (CLP) reflect increased dust accumulation due to increased aridity and/or wind strength during glaciations, whereas higher dust accumulation in the CLP record reflects increased summer Asian monsoon strength, which is an interglacial signal (Sun and An, 2005).

Accordingly, factor loadings for the dust records are all positive for PC1 except for the CLP.

In contrast to the change in variance seen in temperature, CO<sub>2</sub>, and CH<sub>4</sub> during MIS11, variance tests of the dust PC1 suggest a stepwise increase in variance during MIS12, with subsequent glaciations having higher amplitudes (Table S12). Separating the records by hemisphere shows that the increase in glacial amplitude starting at MIS 12 occurs in the southern PC1 but not in the northern PC1 (Figure 67). Similarly, the signal during MIS 14 present in the global PC1 is absent in the northern PC1, suggesting that the northern control on dust accumulation was skipped during that glacial.

Spectral analysis of the global PC1 indicates dominant power in the 100-kyr-frequency band that increases in spectral power across the MBT (Figure 53b). Furthermore, wavelet analysis of PC1 demonstrates an increase in the spectral power of the 100-kyr band at ~600 ka with its highest power during MIS 11 (Figure 45b), similar to the SST PC1. The 100-kyr frequency remains statistically significant throughout the interval 100-600 ka.

### 3.4 $\delta^{13}\text{C}$

The first principal component of the global  $\delta^{13}\text{C}$  ( $\delta^{13}\text{C}_\text{G}$ ; PC1) explains 58% of the total variance (Figure 4e3c). EOF analysis of  $\delta^{13}\text{C}$  records from the Atlantic basin ( $\delta^{13}\text{C}_\text{ATL}$ ) yields two statistically significant PCs with PC1 and PC2 explaining 58% and 13% of the total variance, respectively (Figure 4d3d). EOF analysis of  $\delta^{13}\text{C}$  records from the Pacific ( $\delta^{13}\text{C}_\text{PAC}$ ) yields one statistically significant principal component (PC1 = 81% total variance) (Figure 4e).

Both the global and Atlantic PC1 exhibit a strong 100-kyr frequency that is persistent from 680 ka to 180 ka (Figure 45c, 45d).

Unlike SST and dust, however,  $\delta^{13}\text{C}_\text{G}$  and  $\delta^{13}\text{C}_\text{ATL}$  demonstrate a stronger 100-kyr power prior to MIS 11 with its highest power

throughout MIS 13 and 12 (510-460 ka). Spectral analysis shows a decrease in power of the 100-kyr-frequency band from pre- to post-MBT (Figure S3f, S3g). Variance tests show that the pre- and post-MBT intervals for  $\delta^{13}\text{C}_G$  and  $\delta^{13}\text{C}_{ATL}$  are statistically different with higher variance during the pre-MBT (Table S12). Spectral analyses and variance tests of  $\delta^{13}\text{C}_{PAC}$  PC1 are similar to  $\delta^{13}\text{C}_G$  and  $\delta^{13}\text{C}_{ATL}$  PC1s. The only difference between the three PC1s is there is less variance recorded in  $\delta^{13}\text{C}_{PAC}$  (Figure 4e3e). We interpret this muted signal to be a result of three factors: the large size of the Pacific relative to the Atlantic, less mixing between water mass end members such as the positive NADW and more negative AABW, and ocean circulation aging the carbon isotopes over time leading to more homogenized water masses in the Pacific.

Factor ~~loadings~~scores for  $\delta^{13}\text{C}_{ATL}$  PC1 are all positive suggesting that the time series is representative of the entire Atlantic basin. In contrast,  $\delta^{13}\text{C}_{ATL}$  PC2 yields negative values for all but the intermediate North Atlantic records and does not show strong 100-kyr spectral power. [As such, these results suggest that PC2 exhibits the dominant mode of variability recorded in the benthic  \$\delta^{13}\text{C}\$  of North Atlantic waters shallower than 2000 m depth.](#) Curry and Oppo (2005) show that NADW formation to below ~2000 m is reduced in the North Atlantic during glacial times. The sites with positive factor ~~scores~~loadings in PC2 are located at depths < 2000 m, and therefore each site should remain consistently bathed in NADW through glacial-interglacial cycles. We thus interpret PC2 as a record of changes in the isotopic values of the North Atlantic carbon reservoir rather than circulation changes.

During MIS 13, all three  $\delta^{13}\text{C}$  PC1s (global, Atlantic, and Pacific) demonstrate high positive values. This excursion, first recognized in individual records by Raymo et al. (1997), clearly stands out relative to other  $\delta^{13}\text{C}$  interglacial values recorded throughout the last 800 kyr. The MIS 13 excursion is even more apparent when compared against other proxy records such as atmospheric  $\text{CO}_2$ , SST, and  $\text{CH}_4$  (Figure 78). This high-amplitude change in  $\delta^{13}\text{C}$  values is similar to the changes recorded in other proxies during MIS 11, yet precedes the MBT by one glacial cycle. Removal of the MIS 13 interval from variance tests results in no statistical difference in variance before and after the MBT suggesting a large effect of the carbon isotope excursion on these calculations.

### 3.4 $\delta^{13}\text{C}$ gradients

Figure 89 shows regional stacks of  $\delta^{13}\text{C}$  from the deep (>2000 m) and intermediate (<2000 m) North Atlantic and the deep South Atlantic. As discussed, the intermediate North Atlantic (INA) signal is predominantly controlled by changes in the carbon reservoir over orbital time scales. In contrast, the deep North Atlantic (DNA) is controlled by changes in the relative influence of

200 [isotopically more positive](#) NADW and [isotopically more negative](#) AABW, as well as any  $\delta^{13}\text{C}$  changes [to reservoir that feeds the](#)  
[deep basin from shallower and surficial waters](#)~~recored in the values of the NADW~~ (i.e., INA). Subtracting the INA from the  
DNA record (i.e. depth gradient) removes the influence of reservoir changes, with the residual time series reflecting only the  
relative influences of AABW and NADW [on the isotopic values of carbon](#) in the [deep](#) North Atlantic. This is supported by  
comparing the North Atlantic depth gradient time series against the South Atlantic stack (Figure [S44](#)). Both time series  
205 demonstrate good correlation for the entire time interval ( $r^2 = 0.58$ ), but even more striking is the similarity in  $\delta^{13}\text{C}$  values, with  
both time series showing similar variability and range in  $\delta^{13}\text{C}$  space. [The isotopic similarity between the two records suggest](#)  
[adequate removal of reservoir influences with the North Atlantic depth gradient thus reflecting changes in dominant water mass](#)  
[influence \(i.e. circulation\)](#). We also note that the correlation between the two records increases starting at MIS 15 (~530 ka).

210 The depth gradient does not show the prominent MIS 13 excursion that was present in the original DNA stack (Figure [89](#)),  
suggesting that the excursion is likely due to a change in the carbon reservoir (represented by the INA) and not related to ocean  
circulation. Figure [94](#) shows contour  $\delta^{13}\text{C}$  plots of the Atlantic basin for MIS 13 and MIS 5e. Although there is some  
uncertainty in the these plots due to limited spatial coverage, they show a clear enrichment of the entire basin during MIS 13  
relative to average post-MBT interglacial conditions, as represented here by MIS 5e. The global and Pacific  $\delta^{13}\text{C}$  PC1s also show  
215 the MIS 13  $\delta^{13}\text{C}$  excursion, suggesting a change in the global carbon reservoir.

We next evaluate the latitudinal gradient between the South Atlantic signal and the DNA signal in order to further assess the  
relative influence of the more negative AABW  $\delta^{13}\text{C}$  values on North Atlantic  $\delta^{13}\text{C}$  values (Figure [102](#)). Lisiecki (2014)  
interpreted weaker gradients during glaciations to reflect shoaling of NADW and greater penetration of AABW, which could  
220 result from reduced NADW formation or stronger AABW formation. Figure [102b](#) shows a stepwise drop in mean values  
beginning in MIS 12 (~436 ka), suggesting a weakening of the gradient due to greater similarity between North Atlantic and  
South Atlantic glacial and interglacial  $\delta^{13}\text{C}$  values.

#### 4. Discussion

225 Our new analyses demonstrate that there was a statistically significant increase in variance in atmospheric  $\text{CO}_2$ , Antarctic  
temperature, global SSTs, and bottom-water temperature at 436 ka. These changes are consistent with a transition between two  
distinct climate states associated with higher amplitude interglaciations starting with MIS 11, supporting the notion of a MBT as  
defined by Yin (2013). The [same](#) ~~proxies~~ [climate variables mentioned above](#) also show an increase in spectral power in the



100-kyr-frequency band after the MBT. On the other hand, the dust analyses suggest that the transition to greater variability was experienced in the Southern Hemisphere in the glacial periods starting with MIS 12.

#### 4.1 MIS 13 carbon isotope excursion

The PC1 of  $\delta^{13}\text{C}_\text{G}$  shows a strong correlation with the  $\text{CO}_2$  record for most of the last 800 kyr (Figure 78a). The exception is during MIS 13, when  $\text{CO}_2$  levels were still at pre-MBT levels while  $\delta^{13}\text{C}_\text{G}$  shows an anomalously high enrichment relative to other interglacial values. This is further illustrated by  $\delta^{13}\text{C}$  contour plots showing that the Atlantic basin was enriched in  $\delta^{13}\text{C}$  during MIS 13 relative to the MIS 5e (Figure 94).

We evaluated records of biologic activity in various locations of the Atlantic and Pacific Oceans to assess potential sources and sinks in the carbon system during MIS 13. Ba/Fe from the Antarctic Zone (AZ) records the sedimentary concentration of biogenic Ba and is thus a proxy of organic matter flux to the deep ocean south of the Polar Front (Jaccard et al., 2013), whereas alkenone concentrations from the Subantarctic Zone (SAZ) indicate export productivity to the deep ocean in the region north of the Polar Front (Martínez-García et al., 2009). Based on these proxies, Jaccard et al. (2013) argued that there were two modes of export productivity in the Southern Ocean (SO), where high/low export occurs in the AZ during interglaciations/glaciations, and low/high export occurs in the SAZ during interglaciations/glaciations. They attributed the increase in SAZ export productivity to iron fertilization from increased dust accumulation in the SAZ associated with intensified SO westerlies during glacial periods. Our Southern Hemisphere dust PC1 record supports this hypothesis in showing that high values of dust accumulation correlate with increased values of SAZ export productivity over the last 800 kyr (Figure S54). We note, however, that the increase in dust starting at MIS 12 does not have an associated decrease in glacial  $\text{CO}_2$  values, suggesting that if iron fertilization contributed to lower  $\text{CO}_2$  levels, it had an upper limit beyond which additional dust fluxes had little effect.

The antiphase relationship between export productivity between the SAZ and AZ requires a mechanism to increase organic matter productivity in the AZ during interglaciations as suggested by the Ba/Fe signal (Figure 43eS5c). In the modern SO, vertical mixing and upwelling drive the delivery of nutrient-rich waters necessary for biologic activity to the surface ocean. Wind-driven upwelling is associated with SO westerlies which shift poleward during interglaciations (Toggweiler et al., 2006). Thus, any reduction of upwelling would result from a more northerly position or decrease in strength of the westerlies; a further decrease in nutrient-rich surface waters in the AZ during glaciations likely resulted from increased SO stratification (Sigman et al., 2010; Jaccard et al., 2013). We note, however, that Jaccard et al. (2013) find no AZ export productivity during MIS 13

whereas all other interglaciations over the last 800 kyr show some evidence for it (Figure 43eS5c). This skipped interglaciation in export productivity suggests some combination of a change in the position/strength of the SO westerlies or stratification of the AZ that limited the delivery of nutrient-rich deep waters to the surface as compared to other interglaciations of the last 800 kyr.

The PC1s of  $\delta^{13}\text{C}$  (global, Atlantic, and Pacific) demonstrate that the global ocean was enriched in heavy carbon during MIS 13 relative to any other interglaciation of the last 800 kyr (Figure 43). In contrast, atmospheric  $\text{CO}_2$  concentrations were  $\sim 240$  ppm during MIS 13, similar to other pre-MBT interglacial levels (Figure 1). Ba/Fe records of organic export productivity from the AZ that acts as a sink for light carbon indicate no increase during this interglaciation while Ca/Al records from the SAZ indicate increased preservation and thus a deeper lysocline and lower dissolved inorganic carbon (Jaccard et al., 2010). The question thus becomes: if the ocean is heavily enriched in  $\delta^{13}\text{C}$  during MIS 13 while  $\text{CO}_2$  and export productivity remained at low levels, what reservoir contained the isotopically light carbon?

Paleoclimate records from the CLP indicate greater precipitation during MIS 13 relative to the other interglaciations (Liu, 1985; Yin and Guo, 2008). This greater precipitation has been attributed to increased monsoon activity recognized throughout monsoonal areas of the Northern Hemisphere and persisting through MIS 15, 14, and 13 (Yin and Guo, 2008; Guo et al., 2009). Biogenic silica measurements from Lake Baikal exhibit continuously high terrestrial productivity in central Asia throughout MIS 15 to MIS 13 (Prokopenko et al., 2002), whereas sea-level reconstructions indicate that ice volume during MIS 14 was considerably less relative to other glacial maxima of the last 800 kyr (Figure 14d) (Elderfield et al., 2012; Shakun et al., 2015). Thus, the smaller ice sheets of MIS 14 would likely have had a lesser effect on displacing forested areas of the Northern Hemisphere, allowing greater terrestrial carbon storage to potentially persist through a glacial cycle (REFERENCE?Harden et al., 1992). We thus suggest that the increased monsoonal precipitation and smaller ice volume during MIS 14 would have combined to increase land biomass that continued into MIS 13. The Northern Hemisphere thus had the potential to store light carbon in the terrestrial reservoir resulting in the enriched  $\delta^{13}\text{C}$  MIS 13 signal seen in the ocean basins (Yin and Guo, 2008).

#### 4.2 Ocean circulation changes in the Atlantic basin

One explanation for the glacial-interglacial variations in atmospheric  $\text{CO}_2$  invokes a dominant role by the Southern Ocean in storing and releasing dissolved inorganic carbon (DIC) in the deep Southern Ocean, with deep-ocean sequestration of atmospheric  $\text{CO}_2$  occurring through decreased upwelling and vertical mixing of AABW (Sigman et al., 2010). Expansion of Southern Ocean sea ice can also lower atmospheric  $\text{CO}_2$  by insulating upwelled water from the atmosphere, thus reducing

outgassing, and by increasing the volume of AABW and its capacity to hold DIC (Stephens and Keeling, 2000; Ferrari et al., 2014). According to this framework, pre-MBT interglaciations with lower CO<sub>2</sub> would be associated with greater sea-ice extent and a larger volume of AABW, whereas post-MBT interglaciations with higher CO<sub>2</sub> suggest reduced sea-ice extent and AABW volume. Glacial values of CO<sub>2</sub> remain relatively constant throughout the last 800 kyr (Figure 1), suggesting that the change in relative AABW volume before and after the MBT only occurred during interglaciations.

This mechanism is consistent with ice-core evidence for greater sea-ice extent during pre-MBT interglaciations (Wolff et al., 2006) and with modeling results that show that interglacial AABW formation decreased after the MBT through insolation-induced feedbacks on sea ice and surface water density (Yin, 2013). Moreover, based on the Ba/Fe proxy of organic matter flux to the deep ocean south of the Polar Front, Jaccard et al. (2013) argued that the deep Southern Ocean reservoir was larger prior to the MBT.

Our analyses of changes in Atlantic  $\delta^{13}\text{C}$  over the last 800 kyr further support an important role of AABW in causing the post-MBT increase in interglacial CO<sub>2</sub>. In particular, the steeper latitudinal gradient between North and South Atlantic  $\delta^{13}\text{C}$  records before the MBT reflects greater northward penetration of AABW, whereas the post-MBT decrease in gradient suggests greater southward penetration of NADW (Figure 102b). These gradient changes are further illustrated by contour plots of average interglacial  $\delta^{13}\text{C}$  values in the Atlantic which show that prior to the MBT, AABW penetrated north of the equator, increasing the  $\delta^{13}\text{C}$  gradient (Figure 125a), in contrast to remaining south of the equator after the MBT, decreasing the gradient (Figure 125c). Removal of MIS 13 and its associated enriched carbon isotope excursion further highlights the greater volume of AABW in the pre-MBT interglacial Atlantic (Figure 125b). We note that a record of the water mass tracer  $\epsilon_{\text{Nd}}$  from 6°N (Howe et al., 2017) is in good agreement with our North Atlantic regional  $\delta^{13}\text{C}$  stack (Figure 102a), with both records suggesting that changes in volume of the interglacial AABW occurred south of the equator. This reorganization of the dominant interglacial water masses in the Atlantic basin across the MBT, perhaps resulting from insolation-induced feedbacks (Yin, 2013) would lead to a greater release of deep-ocean CO<sub>2</sub> during the post-MBT interglaciations, with corresponding warmer interglaciations (Figure 56). An alternative explanation for the observed decrease in latitudinal gradient could be changes in the isotopic composition of AABW across this time period. However, modeling results of long-term carbon fluctuations across this interval suggest that changes in the burial rate of organic and inorganic carbon to explain caused the  $\delta^{13}\text{C}$  depletion – the opposite signal necessary to create the increased similarity between northern- and southern-sourced waters (Hoogakker et al., 2006). Thus, it is more likely explained by changes in AABW influence above north of the equator.

320

Cross-spectral analysis of pre-MBT North and South Atlantic  $\delta^{13}\text{C}$  stacks indicates in-phase coherency between the records at the eccentricity and obliquity frequencies. Similar tests for the post-MBT  $\delta^{13}\text{C}$  stacks exhibit coherency at eccentricity, obliquity, and precession frequencies, with the South Atlantic stack leading the North Atlantic by  $\sim 23^\circ$  (7 kyr) in eccentricity,  $\sim 18^\circ$  (2 kyr) in obliquity, and  $\sim 36^\circ$  (2 kyr) in precession (Figure 46S6). All phase relationships overlap within uncertainty, suggesting that South Atlantic  $\delta^{13}\text{C}$  leads North Atlantic  $\delta^{13}\text{C}$  by 2-7 kyr following the MBT. This lead by the South Atlantic is most apparent during terminations (Figures 9, 12) and is most likely related to deglacial mechanisms for ventilation of respired  $\text{CO}_2$  from the deep Southern Ocean such as enhanced wind-driven upwelling or the melting of sea ice in response to the bipolar seesaw (Cheng et al., 2009).

325

## 5. Conclusions

330

Using statistical analyses of multiple climate proxies, we have further characterized the Mid-Brunhes Transition as an increase in interglacial sea-surface and Antarctic temperatures, atmospheric  $\text{CO}_2$ , and  $\text{CH}_4$  beginning with MIS 11-. At the same time, our new analyses also document a number of changes in other components of the climate system that began as early as MIS 14 that suggest a more complex sequence of events prior to the MBT, although their relationship to the MBT remains unclear. Figure 137 highlights key features in the sequence of events beginning with an increase in Asian summer monsoon strength during MIS 15 that persisted through MIS 14 and into MIS 13. The strong monsoon strength during MIS 14 is associated with a weak glaciation, which in combination would have been conducive to a build-up of Northern Hemisphere land biomass. A continued strong Asian summer monsoon during MIS 13 associated with greater precipitation would have further sequestered land biomass and provided a reservoir for light carbon, resulting in the oceans becoming unusually enriched in  $\delta^{13}\text{C}$  as recorded in the global benthic  $\delta^{13}\text{C}$  carbon isotope excursion. MIS 12 was associated with the return of large ice sheets, collapse of the Asian summer monsoon, and the first increase in amplitude of Southern Hemisphere dust. A decrease in the latitudinal gradient of interglacial Atlantic  $\delta^{13}\text{C}$  at the MBT suggests a reorganization of the water masses in the basin and reduction in the size of interglacial AABW, thus possibly explaining the increase in interglacial values of atmospheric  $\text{CO}_2$  with corresponding increases in interglacial SSTs and  $\text{CH}_4$ . This evidence for a change in AABW is consistent with modeling results that suggest that the MBT was forced by insolation (Yin, 2013).

340

## References

- Bickert, T., Curry, W.B., Wefer, G., 1997. Late Pliocene to Holocene (2.6-0 Ma) western equatorial Atlantic deep-water circulation: Inferences from benthic stable isotopes. *Proc. Ocean Drill. Program Sci. Results* 154.
- Bickert, T., and G. Wefer (1996), Late Quaternary deep water circulation in the South Atlantic: Reconstruction from carbonate dissolution and benthic stable isotopes, in *The South Atlantic: Present and Past Circulation* edited by G. Wefer et al., pp. 599-620, Springer, New York.
- Cheng, H., Edwards, R. L., Broecker, W. S., Denton, G. H., Kong, X., Wang, Y. J., Zhang, R., and Wang, X.: Ice Age Terminations, *Science*, 326, 248-252, 2009.
- Cheng, X., Tian, J., Wang, P., 2004. Data report: Stable isotopes from Site 1143. In *Prell, W.L., Wang, P., Blum, P., Rea, D.K., and Clemens, S.C. (Eds.), Proc. ODP, Sci. Results*, 184, College Station, TX (Ocean Drilling Program).
- Clark, P. U., Archer, D., Pollard, D., Blum, J. D., Rial, J. A., Brovkin, V., Mix, A. C., Pisias, N. G., and Roy, M.: The middle Pleistocene transition: characteristics, mechanisms, and implications for long-term changes in atmospheric pCO<sub>2</sub>, *Quaternary Science Reviews*, 25, 3150-3184, 2006.
- Curry, W. B., Oppo, D. W.: Glacial water mass geometry and the distribution of  $\delta^{13}\text{C}$  of  $\Sigma\text{CO}_2$  in the western Atlantic Ocean, *Paleoceanography*, 20, 1-12, 2005.
- de Garidel-Thoron, T., Rosenthal, Y., Bassinot, F., Beaufort, L., 2005. Stable sea surface temperatures in the western Pacific warm pool over the past 1.75 million years. *Nature* 433, 294-298.
- deMenocal, P.B., Oppo, D.W., Fairbanks, R.G., Prell, W.L., 1992. Pleistocene  $^{13}\text{C}$  variability of North Atlantic intermediate water. *Paleoceanography* 7, 229-250.
- deMenocal, P., 1995. Plio-Pleistocene African Climate. *Science* 270, 53-59.
- Elderfield, H., Ferretti, P., Greaves, M., Crowhurst, S., McCave, I. N., Hodell, D. A., and Piotrowski, A. M.: Evolution of Ocean Temperature and Ice Volume Through the Mid-Pleistocene Climate Transition, *Science*, 337, 704-709, 2012.
- EPICA-community-members: Eight glacial cycles from an Antarctic ice core, *Nature*, 429, 623-628, 2004.
- Etourneau, J., Martinez, P., Blanz, T., Schneider, R., 2009. Pliocene-Pleistocene variability of upwelling activity, productivity, and nutrient cycling in the Benguela region. *Geology* 37, 871-874.
- Ferrari, R., Jansen, M. F., Adkins, J. F., Burke, A., Stewart, A. L., and Thompson, A. F.: Antarctic sea ice control on ocean circulation in present and glacial climates, *Proc Natl Acad Sci U S A*, 111, 8753-8758, 2014.
- Guo, Z. T., Berger, A., Yin, Q. Z., and Qin, L.: Strong asymmetry of hemispheric climates during MIS-13 inferred from correlating China loess and Antarctica ice records, *Climate of the Past*, 5, 21-31, 2009.
- Harden, J. W., Mark, R. K., Sundquist, E. T., Stallard, R. F.: Dynamics of soil carbon during deglaciation of the Laurentide Ice Sheet, *Science*, 258, 1921-1924.
- Herbert, T.D., Peterson, L.C., Lawrence, K.T., Liu, Z., 2010. Tropical Ocean Temperatures Over the Past 3.5 Million Years. *Science* 328, 1530-1534.
- Hodell, D., C. Charles, and U. Ninnemann (2000), Comparison of interglacial stages in the South Atlantic sector of the southern ocean for the past 450 kyr: implications for Marine Isotope Stage (MIS) 11, *Global and Planetary Change*, 24, 7-26.
- Hodell, D. A., C. D. Charles, J. H. Curtis, P. G. Mortyn, U. S. Ninnemann, and K. A. Venz (2003), Data Report: Oxygen isotope stratigraphy of ODP Leg 177 Sites 1088, 1089, 1090, 1093, and 1094, *Proc. Ocean Drill. Program Sci. Results*, 177, 1-26.
- Hodell, D.A., Channell, J.E.T., Curtis, J.H., Romero, O.E., Röhl, U., 2008. Onset of "Hudson Strait" Heinrich events in the eastern North Atlantic at the end of the middle Pleistocene transition (~640 ka)? *Paleoceanography* 23,

Hoogakker, B. A. A., Rohling, E. J., Palmer, M. R., Tyrrell, T., Rothwell, R. G.: [Underlying causes for long-term global ocean  \$\delta^{13}\text{C}\$  fluctuations over the last 1.20 Myr, Earth and Planetary Science Letters, 248, 15-29, 2006.](#)

405 Howe, J. N. W., Piotrowski, A. M.: Atlantic deep water provenance decoupled from atmospheric  $\text{CO}_2$  concentration during the lukewarm interglacials, *Nature Communications*, 8, 1-7, 2017.

Howell, P., Pisias, N. G., Ballance, J., Baughman, J., and Ochs, L.: ARAND Time-Series Analysis Software, Brown University, Providence, RI, 2006.

410 Imbrie, J., Berger, A., Boyle, E. A., Clemens, S. C., Duffy, A., Howard, W. R., Kukla, G., Kutzbach, J., Martinson, D. G., McIntyre, A., Mix, A. C., Molfino, B., Morley, J. J., Peterson, L. C., Pisias, N. G., Prell, W. L., Raymo, M. E., Shackleton, N. J., and Toggweiler, J. R.: On the structure and origin of major glaciation cycles 2. The 100,000-year cycle, *Paleoceanography*, 8, 699-735, 1993.

415 [Jaccard, S. L., Galbraith, E. D., Sigman, D. M., Haug, G. H.: A pervasive link between Antarctic ice core and subarctic Pacific sediment records over the past 800 kyrs, Quaternary Science Reviews, 29, 206-212, 2010.](#)

420 Jaccard, S. L., Hayes, C. T., Martinez-Garcia, A., Hodell, D. A., Anderson, R. F., Sigman, D. M., and Haug, G. H.: Two modes of change in Southern Ocean productivity over the past million years, *Science*, 339, 1419-1423, 2013.

Jansen, J. H. F., Kuijpers, A., and Troelstra, S. R.: A Mid-Brunhes Climatic Event: Long-Term Changes in Global Atmosphere and Ocean Circulation, *Science*, 232, 619-622, 1986.

425 Jouzel, J., Masson-Delmotte, V., Cattani, O., Dreyfus, G., Falourd, S., Hoffman, G., Minster, B., Nouet, J., Barnola, J. M., Chappellaz, J., Fischer, H., Gallet, J. C., Johnsen, S., Leuenberger, D., Loulergue, L., Luethi, D., Oerter, H., Parrenin, F., Raisbeck, G. M., Raynaud, D., Schilt, A., Schwander, J., Selmo, E., Souchez, R. A., Spahni, R., Stauffer, B., Steffensen, J. P., Stenni, B., Stocker, T. F., Tison, J. L., Werner, M., and Wolff, E. W.: Orbital and Millennial Antarctic Climate Variability over the Past 800,000 Years, *Science*, 317, 793-796, 2007.

430 Kemp, A. E. S., Grigorov, I., Pearce, R. B., and Naveira Garabato, A. C.: Migration of the Antarctic Polar Front through the mid-Pleistocene transition: evidence and climatic implications, *Quaternary Science Reviews*, 29, 1993-2009, 2010.

435 [Lambert, F., Delmonte, B., Petit, J.R., Bigler, M., Kaufmann, P.R., Hutterli, M.A., Stocker, T.F., Ruth, U., Steffensen, J.P., Maggi, V., 2008. Dust-climate couplings over the past 800,000 years from the EPICA Dome C ice core. Nature 452, 616-619.](#)

[Lamy, F., Gersonde, R., Winckler, G., Esper, O., Jaeschke, A., Kuhn, G., Ullermann, J., Martinez-Garcia, A., Lambert, F., Kilian, R., 2014. Increased Dust Deposition in the Pacific Southern Ocean During Glacial Periods. Science 343, 403-407.](#)

440 Laskar, J., Robutel, P., Joutel, F., Gastineau, M., Correia, A. C. M., and Levrard, B.: A long term numerical solution for the insolation quantities of the Earth, *Astronomy & Astrophysics*, 2004.

[Lawrence, K.T., Herbert, T.D., Brown, C.M., Raymo, M.E., Haywood, A.M., 2009. High-amplitude variations in North Atlantic sea surface temperature during the early Pliocene warm period. Paleoceanography 24.](#)

[Li, L., Li, Q., Tian, J., Wang, P., Wang, H., Liu, Z., 2011. A 4-Ma record of thermal evolution in the tropical western Pacific and its implications on climate change. Earth and Planetary Science Letters 309, 10-20.](#)

450 Lisiecki, L. E., and Raymo, M. E.: A Pliocene-Pleistocene stack of 57 globally distributed benthic  $\delta^{18}\text{O}$  records, *Paleoceanography*, 20, 1-17, 2005.

[Lisiecki, L.E., Raymo, M.E., Curry, W.B., 2008. Atlantic overturning responses to Late Pleistocene climate forcings. Nature 456, 85-88.](#)

455 Lisiecki, L. E.: Atlantic overturning responses to obliquity and precession over the last 3 Myr, *Paleoceanography*, 29, 71-86, 2014.

Liu, T. S.: Loess and the Environment, China Ocean Press, Beijing, 1985.

460

[Liu, Z., Herbert, T.D., 2004. High-latitude influence on the eastern equatorial Pacific climate in the early Pleistocene epoch. \*Nature\* 427, 720-723.](#)

465

Luthi, D., Le Floch, M., Bereiter, B., Blunier, T., Barnola, J. M., Siegenthaler, U., Raynaud, D., Jouzel, J., Fischer, H., Kawamura, K., and Stocker, T. F.: High-resolution carbon dioxide concentration record 650,000-800,000 years before present, *Nature*, 453, 379-382, 2008.

470

Martínez-García, A., Rosell-Melé, A., Geibert, W., Gersonde, R., Masqué, P., Gaspari, V., and Barbante, C.: Links between iron supply, marine productivity, sea surface temperature, and CO<sub>2</sub> over the last 1.1 Ma, *Paleoceanography*, 24, 1-14, 2009.

[Martínez-García, A., Rosell-Melé, A., Jaccard, S.L., Geibert, W., Sigman, D.M., Haug, G.H., 2011. Southern Ocean dust-climate coupling over the past four million years. \*Nature\* 476, 312-315.](#)

475

[McIntyre, K., Ravelo, A.C., Delaney, M.L., 1999. North Atlantic Intermediate Waters in the late Pliocene to early Pleistocene. \*Paleoceanography\* 14, 324-335.](#)

[Medina-Elizalde, M., Lea, D.W., 2005. The mid-Pleistocene transition in the tropical Pacific. \*Science\* 310, 1009-1012.](#)

480

[Mix, A.C., Le, J., Shackleton, N.J., 1995a. Benthic foraminiferal stable isotope stratigraphy from Site 846: 0-1.8 Ma. \*Proc Ocean Drill Program Sci. Results\* 138, 839-847.](#)

[Mix, A.C., Pisias, N.G., Rugh, W., Wilson, J., Morey, A., Hagelberg, T.K., 1995b. Benthic foraminifer stable isotope record from Site 849 \(0-5 Ma\): Local and global climate changes. \*Proc. Ocean Drill. Program Sci. Results\* 138.](#)

485

[Naafs, B.D.A., Hefter, J., Acton, G., Haug, G.H., Martínez-García, A., Pancost, R., Stein, R., 2012. Strengthening of North American dust sources during the late Pliocene \(2.7Ma\). \*Earth and Planetary Science Letters\* 317-318, 8-19.](#)

[Oppo, D. W., R. G. Fairbanks, A. L. Gordon, and N. J. Shackleton \(1990\), Late Pleistocene Southern Ocean 13C variability. \*Paleoceanography\*, 5, 43-54.](#)

490

[Oppo, D.W., McManus, J.F., Cullen, J.L., 1998. Abrupt climate events 500,000 to 340,000 years ago; evidence from subpolar North Atlantic sediments. \*Science\* 279, 1335-1338.](#)

495

Paillard, D., Labeyrie, L., and Yiou, P.: Macintosh program performs time-series analysis, *Eos Trans. AGU*, 77, 1996.

Pisias, N. G., and Moore, T. C.: The Evolution of Pleistocene Climate: A Time Series Approach, *Earth and Planetary Science Letters*, 52, 450-458, 1981.

500

[Pisias, N.G., Mix, A.C., 1997. Spatial and temporal oceanographic variability of the eastern equatorial Pacific during the late Pleistocene: Evidence from Radiolaria microfossils. \*Paleoceanography\* 12, 381-393.](#)

Prokopenko, A. A., Williams, D. F., Kuzmin, D. V., Karabanov, E. B., Khursevich, G. K., and Peck, J. A.: Muted climate variations in continental Siberia during the mid-Pleistocene epoch, *Nature*, 418, 65-68, 2002.

505

[Prokopenko, A.A., Hinnov, L.A., Williams, D.F., Kuzmin, M.I. 2006. Orbital forcing of continental climate during the Pleistocene: a complete astronomically tuned climatic record from Lake Baikal, SE Siberia. \*Quaternary Science Reviews\*, 25, 3431-3457.](#)

510

Raymo, M. E., Oppo, D., and Curry, W.: The mid-Pleistocene climate transition: A deep sea carbon isotope perspective, *Paleoceanography*, 12, 546-559, 1997.

[Raymo, M.E., 2004. Stability of North Atlantic water masses in face of pronounced climate variability during the Pleistocene. \*Paleoceanography\* 19.](#)

515

[Ruddiman, W.F., Raymo, M.E., Martinson, D.G., Clement, B.M., Backman, J., 1989. Pleistocene evolution: Northern Hemisphere ice sheets and North Atlantic Ocean. \*Paleoceanography\* 4, 353-412.](#)



\$20 [Russon, T., Elliot, M., Sadekov, A., Cabioch, G., Corrège, T., De Deckker, P., 2010. Inter-hemispheric asymmetry in the early Pleistocene Pacific warm pool. \*Geophysical Research Letters\* 37.](#)

[Schaefer, G., Rodger, J.S., Hayward, B.W., Kennett, J.P., Sabaa, A.T., Scott, G.H., 2005. Planktic foraminiferal and sea surface temperature record during the last 1 Myr across the Subtropical Front, Southwest Pacific. \*Marine Micropaleontology\* 54, 191-212.](#)

525 Shakun, J. D., Lea, D. W., Lisiecki, L. E., and Raymo, M. E.: An 800-kyr record of global surface ocean  $\delta$  18O and implications for ice volume-temperature coupling, *Earth and Planetary Science Letters*, 426, 58-68, 2015.

\$30 [Shackleton, N.J., Berger, A., Peltier, W.R., 1990. An alternative astronomical calibration of the Lower Pleistocene timescale based on ODP Site 677. \*Trans. R. Soc. Edinburgh Earth Sci.\* 81.](#)

Sigman, D. M., Hain, M. P., and Haug, G. H.: The polar ocean and glacial cycles in atmospheric CO<sub>2</sub> concentration, *Nature*, 466, 47-55, 2010.

535 Stephens, B. B., Keeling, R. F.: The influence of Antarctic sea ice on glacial-interglacial CO<sub>2</sub> variations, *Nature*, 404, 171-174, 2000.

Sun, Y., and An, Z.: Late Pliocene-Pleistocene changes in mass accumulation rates of eolian deposits on the central Chinese Loess Plateau, *Journal of Geophysical Research*, 110, 1-8, 2005.

\$40 [Tiedemann, R., Sarnthein, M., Shackleton, N.J., 1994. Astronomic timescale for the Pliocene Atlantic  \$\delta\$ 18O and dust flux records of Ocean Drilling Program site 659. \*Paleoceanography\* 9, 619-638.](#)

Toggweiler, J. R., Russell, J. L., and Carson, S. R.: Midlatitude westerlies, atmospheric CO<sub>2</sub>, and climate change during the ice ages, *Paleoceanography*, 21, 1-15, 2006.

545 [Venz, K.A., Hodell, D.A., Stanton, C., Warnke, D.A., 1999. A 1.0 Myr Record of Glacial North Atlantic Intermediate Water Variability from ODP Site 982 in the Northeast Atlantic. \*Paleoceanography\* 14, 42-52.](#)

[Venz, K.A., Hodell, D.A., 2002. New evidence for changes in Plio-Pleistocene deep water circulation from Southern Ocean ODP Leg 177 Site 1090. \*Palaeogeography, Palaeoclimatology, Palaeoecology\* 182, 197-220.](#)

\$50 [Wefer, G et al. \(1996\): Late Quaternary surface circulation of the South Atlantic: The stable isotope record and implications for heat transport and productivity. In: Wefer, G; Berger, W H; Siedler, G & Webb, D \(eds.\), \*The South Atlantic: Present and Past Circulation\*, Springer, Berlin, Heidelberg, 461-502](#)

\$55 Wolff, E. W., Fischer, H., Fundel, F., Ruth, U., Twarloh, B., Littot, G. C., Mulvaney, R., Röthlisberger, R., de Angelis, M., Boutron, C. F., Hansson, M., Jonsell, U., Hutterli, M. A., Lambert, F., Kaufmann, P., Stauffer, B., Stocker, T. F., Steffensen, J. P., Bigler, M., Siggaard-Andersen, M. L., Udisti, R., Becagli, S., Castellano, E., Severi, M., Wagenback, D., Barbante, C., Gabrielli, P., Gaspari, V.: Southern Ocean sea-ice extent, productivity and iron flux over the past eight glacial cycles, *Nature*, 440, 491-496, 2006.

560 Yin, Q.: Insolation-induced mid-Brunhes transition in Southern Ocean ventilation and deep-ocean temperature, *Nature*, 494, 222-225, 2013.

565 Yin, Q. Z., and Guo, Z. T.: Strong summer monsoon during the cool MIS-13, *Climate of the Past*, 4, 29-34, 2008.
