# Supplementary material for: Climate evolution across the Mid-Brunhes Transition
Source: Copernicus journal article supplement (doi:10.5194/cp-2018-20), 2018-03-27
Supplement: Supplementary file [file cp-2018-20-AC2-supplement.zip]

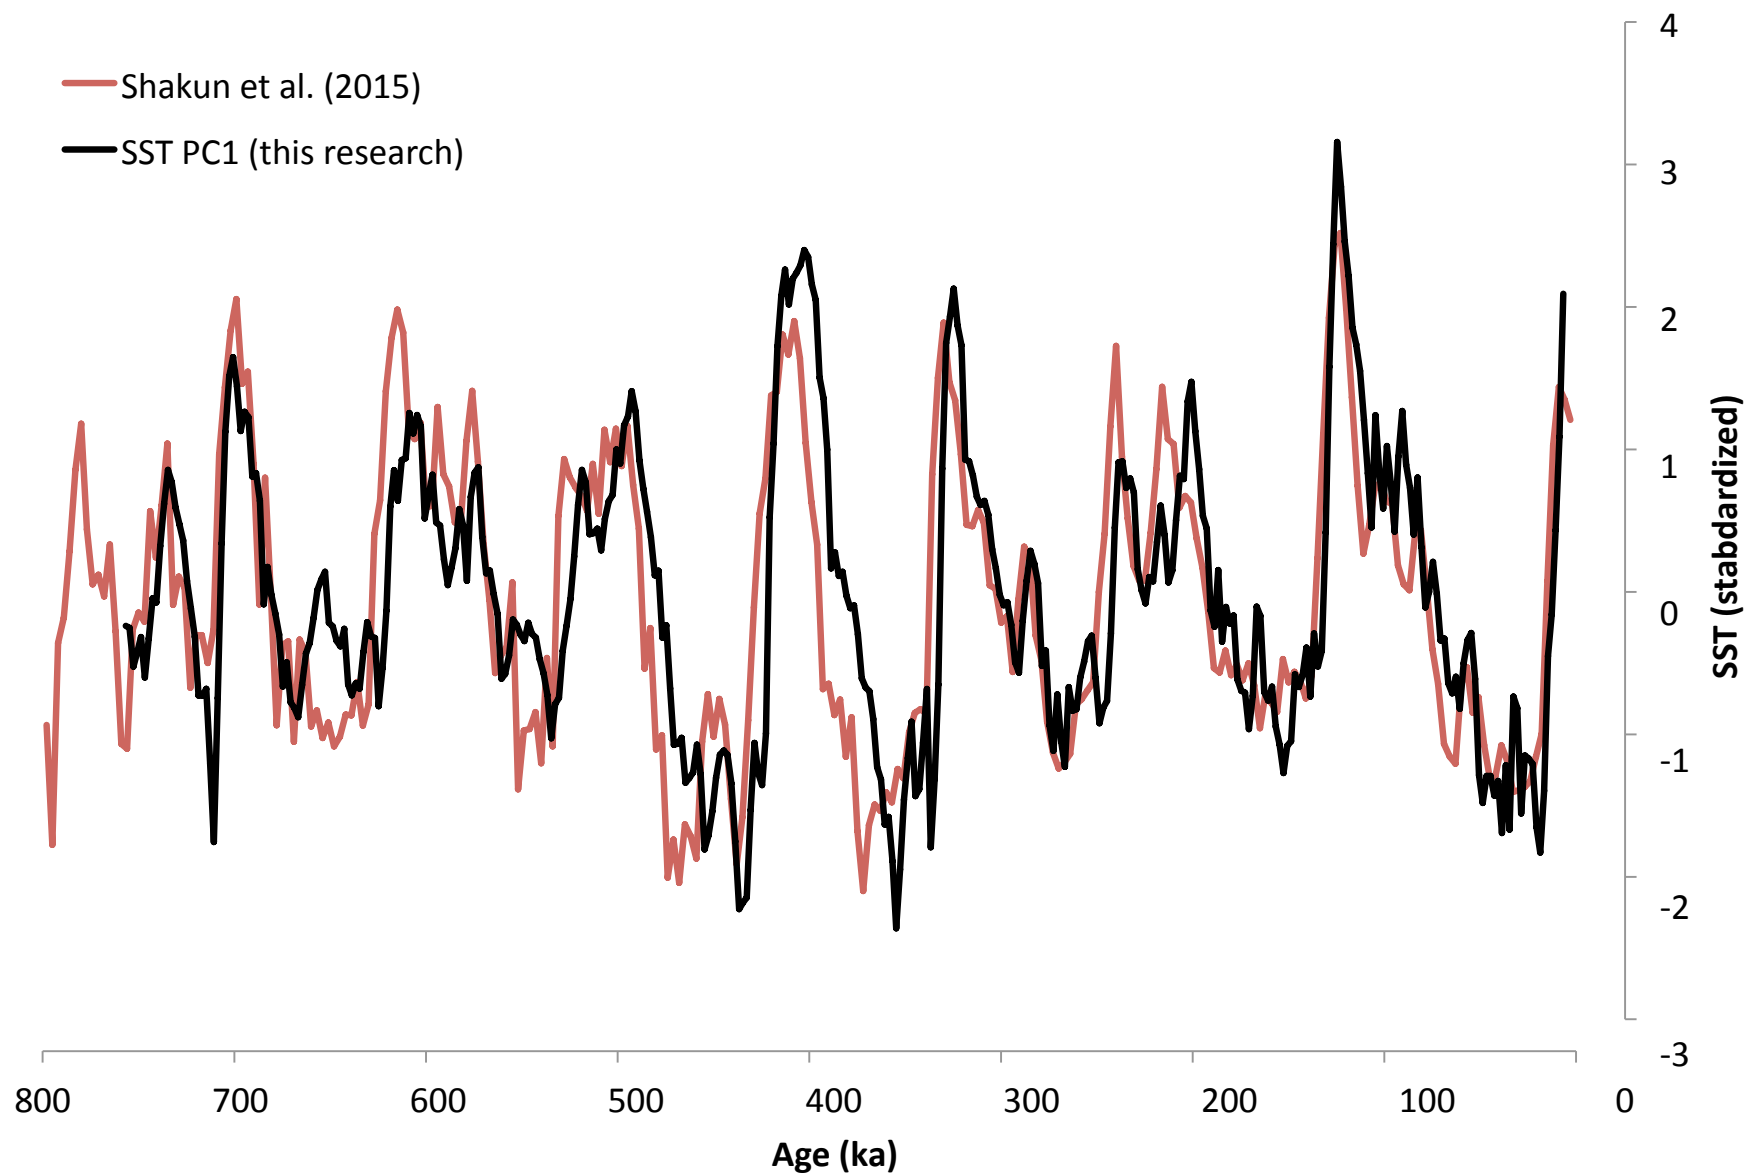

**Figure S1 - Comparison of sea-surface temperature results.** Results of a sea-surface temperature stack ( $n = 49$ ; red; Shakun et al., 2015) and the first principal component of our sea-surface temperature analysis ( $n = 15$ ; black).

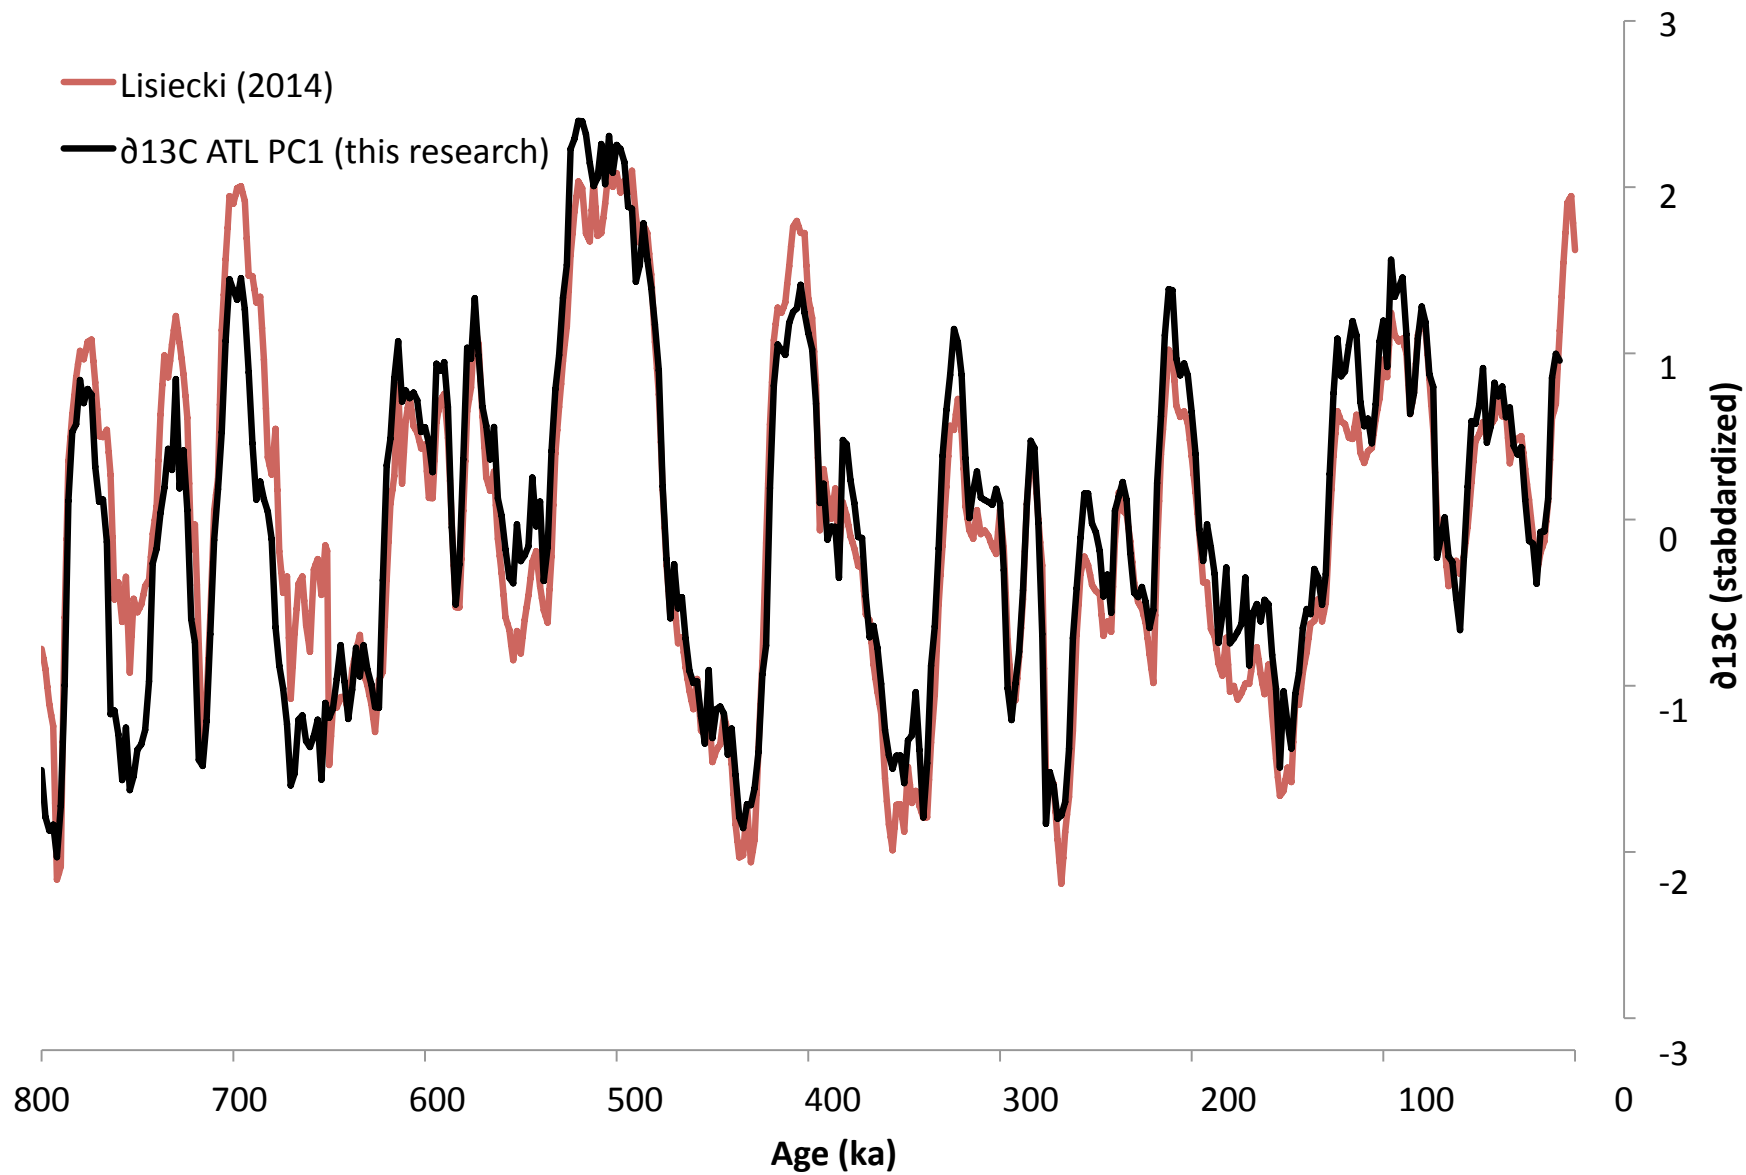

**Figure S2 - comparison benthic carbon isotope results.** Results of a benthic  $\delta^{13}\text{C}$  stack ( $n = 46$ ; red; Lisiecki, 2014) and the first principal component of our global benthic  $\delta^{13}\text{C}$  analysis (black).

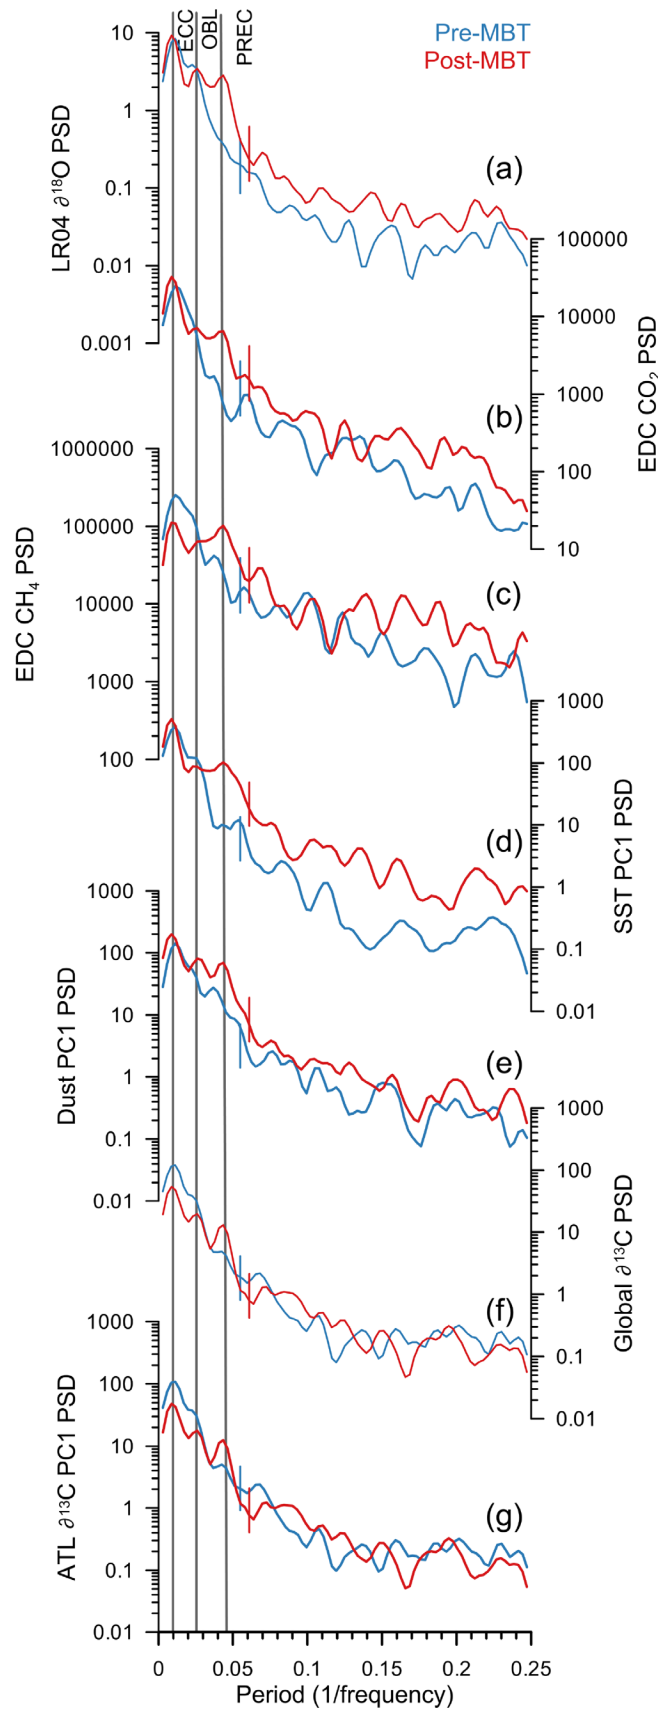

**Figure 3 – Spectral power analyses.** Power spectral density plots of major climate variables. Blue plot represents the pre-MBT time interval (800-450 ka). Red plot represents the post-MBT (350-8 ka). Vertical lines represent the dominant Milankovitch periods at 100-, 41-, and 23-kyr. **a**, LR04 benthic oxygen isotope stack. **b**, EPICA Dome C CO<sub>2</sub>. **c**, EPICA Dome C CH<sub>4</sub>. **d**, Sea-surface temperatures PC1. **e**, Dust PC1. **f**, Global  $\delta^{13}\text{C}$  PC1. **g**, Atlantic  $\delta^{13}\text{C}$  PC1.

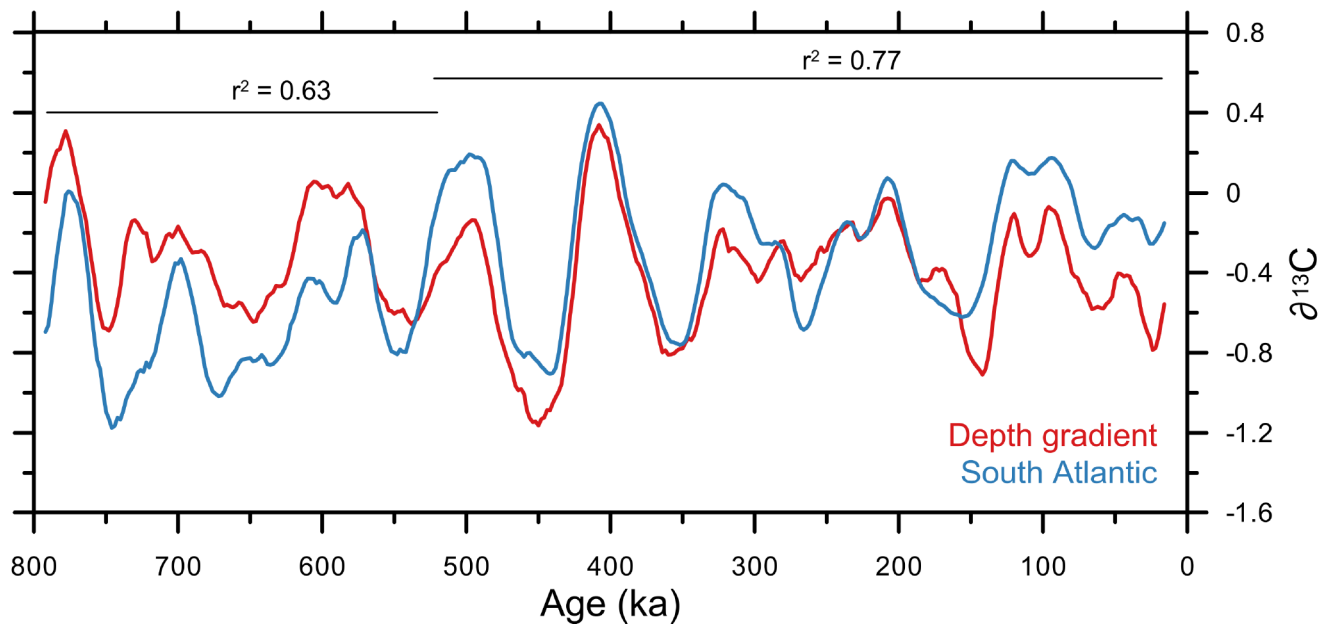

**Figure 10 –North Atlantic depth gradient and South Atlantic  $\delta^{13}\text{C}$ .** Depth gradient of the North Atlantic  $\delta^{13}\text{C}$  records (Deep minus Intermediate; red) compared with the Deep South Atlantic  $\delta^{13}\text{C}$  stack (blue). Each record has been smoothed using a 9-point moving average. Both are plotted in  $\delta^{13}\text{C}$  space to highlight the similarity in values once the isotopic influence of the Intermediate North Atlantic is removed. Horizontal lines indicate a period of lower correlation ( $r^2 = 0.63$ ) prior to MIS 15, and higher correlation ( $r^2 = 0.77$ ) after the MIS 15.

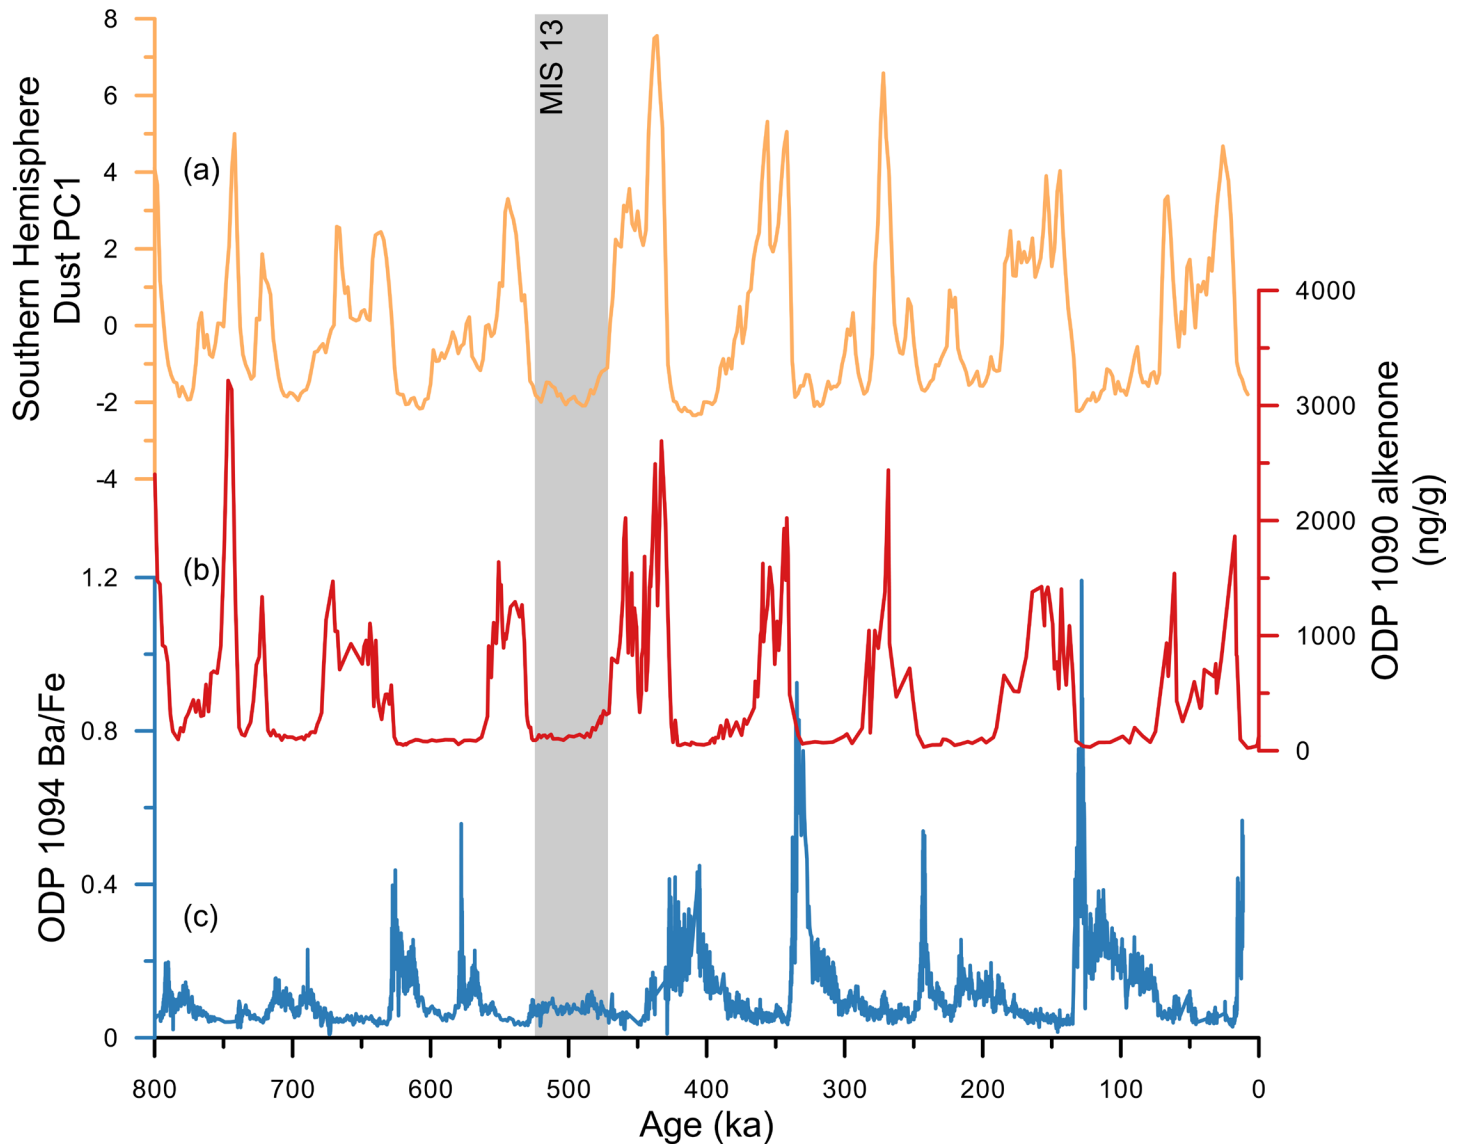

**Figure 13 – Dust and productivity.** **a**, the first principal component of southern dust (orange). The y-axis has been inverted to show interglacial periods as up. **b**, Alkenone record of export productivity from the Subantarctic Zone (ODP 1090; Martinez-Garcia et. al, 2009; red). **c**, Ba/Fe ratios show export productivity from the Antarctic Zone (ODP 1094; Jaccard et al., 2013; blue). The vertical gray box highlights a period of little to no export productivity or dust during MIS 13.

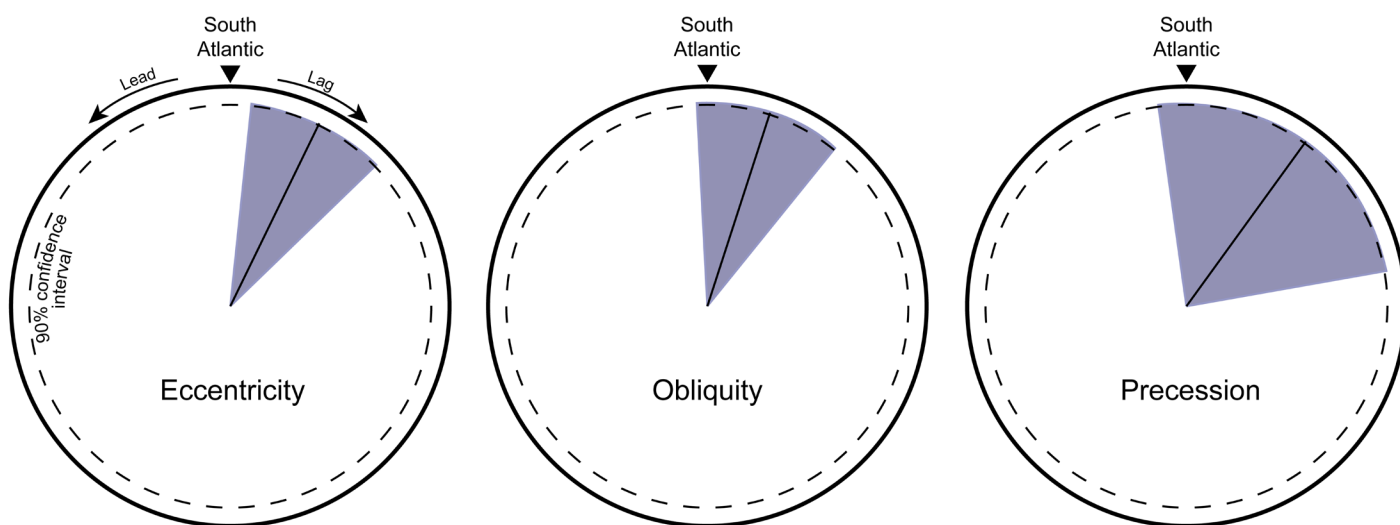

**Figure 16 – Post-MBT  $\delta^{13}\text{C}$  phase wheels.** Phase wheels for each of the Milankovitch cycles (eccentricity, obliquity, and precession) between the North and South Atlantic  $\delta^{13}\text{C}$  regional stacks. The arrow at the top of each wheel shows an in-phase relationship of the North Atlantic with the South Atlantic in that frequency band. Values to the right indicate a lag by the North Atlantic relative to the South Atlantic. Values to the left indicate a lead by the North Atlantic relative to the South Atlantic. Purple shading indicates the uncertainty in each relationship. Dotted line highlights the 90% confidence interval for each frequency.

Table S1 - Variance tests

| Data Set                                     | Variable              | Period   | Variance <sup>a</sup> | F-test <sup>b</sup> |
|----------------------------------------------|-----------------------|----------|-----------------------|---------------------|
| SST_PC1                                      | SST                   | Post-MBT | 8.9681                | Reject              |
| SST_PC1                                      | SST                   | Pre-MBT  | 6.5399                |                     |
| SST_PC2                                      | SST                   | Post-MBT | 1.8564                |                     |
| SST_PC2                                      | SST                   | Pre-MBT  | 1.2808                |                     |
| EDC CO <sub>2</sub>                          | CO <sub>2</sub>       | Post-MBT | 619.6373              | Reject              |
| EDC CO <sub>2</sub>                          | CO <sub>2</sub>       | Pre-MBT  | 467.1198              |                     |
| $\delta^{13}\text{C}$ Atlantic PC1           | $\delta^{13}\text{C}$ | Post-MBT | 0.9950                | Reject              |
| $\delta^{13}\text{C}$ Atlantic PC1           | $\delta^{13}\text{C}$ | Pre-MBT  | 1.9414                |                     |
| $\delta^{13}\text{C}$ Atlantic PC1 no MIS 13 | $\delta^{13}\text{C}$ | Post-MBT | 0.9950                | Reject              |
| $\delta^{13}\text{C}$ Atlantic PC1 no MIS 13 | $\delta^{13}\text{C}$ | Pre-MBT  | 1.9414                |                     |
| $\delta^{13}\text{C}$ Atlantic PC2           | $\delta^{13}\text{C}$ | Post-MBT | 0.2365                | Reject              |
| $\delta^{13}\text{C}$ Atlantic PC2           | $\delta^{13}\text{C}$ | Pre-MBT  | 0.3378                |                     |
| $\delta^{13}\text{C}$ Pacific PC1            | $\delta^{13}\text{C}$ | Post-MBT | 0.2283                | Reject              |
| $\delta^{13}\text{C}$ Pacific PC1            | $\delta^{13}\text{C}$ | Pre-MBT  | 0.4317                |                     |
| $\delta^{13}\text{C}$ Global                 | $\delta^{13}\text{C}$ | Post-MBT | 1.1744                | Reject              |
| $\delta^{13}\text{C}$ Global                 | $\delta^{13}\text{C}$ | Pre-MBT  | 2.1739                |                     |
| $\delta^{13}\text{C}$ Global                 | $\delta^{13}\text{C}$ | Post-MBT | 1.1744                | Reject              |
| $\delta^{13}\text{C}$ Global                 | $\delta^{13}\text{C}$ | Pre-MBT  | 2.1739                |                     |
| LR04 $\delta^{18}\text{O}$                   | $\delta^{18}\text{O}$ | Post-MBT | 0.1965                | Reject              |
| LR04 $\delta^{18}\text{O}$                   | $\delta^{18}\text{O}$ | Pre-MBT  | 0.1572                |                     |
| Dust Global                                  | Dust                  | Post-MBT | 4.5498                | Reject              |
| Dust Global                                  | Dust                  | Pre-MBT  | 2.6819                |                     |
| EDC CH <sub>4</sub>                          | CH <sub>4</sub>       | Post-MBT | 5432.4                |                     |
| EDC CH <sub>4</sub>                          | CH <sub>4</sub>       | Pre-MBT  | 6012.4                |                     |
| EDC Temperature                              | Deuterium             | Post-MBT | 270.1                 | Reject              |
| EDC Temperature                              | Deuterium             | Pre-MBT  | 116.3                 |                     |
| Bottom water temp.                           | Mg/Ca                 | Post-MBT | 0.0105                | Reject              |
| Bottom water temp.                           | Mg/Ca                 | Pre-MBT  | 0.0069                |                     |

<sup>a</sup>Variance values for the intervals "Pre-MBT" (450-800 ka) and "Post-MBT" (0-350 ka)<sup>b</sup>F-tests of the null hypothesis that variance in the Pre- and Post-MBT time intervals are the same

Table S2 - EOF Results

| Core                                      | EOF-1   | EOF-2   |
|-------------------------------------------|---------|---------|
| <i>Sea-surface temperature</i>            |         |         |
| DSDP 607                                  | 2.4611  | -1.4678 |
| ODP 846                                   | 0.6214  | 0.1373  |
| ODP 982                                   | 0.9055  | 0.1431  |
| ODP 1143                                  | 0.5791  | 0.0256  |
| ODP 1082                                  | 1.2605  | -0.0162 |
| ODP 1313                                  | 1.5653  | -0.0557 |
| ODP 722                                   | 0.6955  | -0.0637 |
| ODP 1146                                  | 0.6955  | -0.0637 |
| ODP 846                                   | 0.6214  | 0.1373  |
| MD97-2140                                 | 0.3085  | 0.0024  |
| MD06-3018                                 | 0.3711  | 0.1174  |
| ODP 806                                   | 0.6318  | 0.0738  |
| DSDP 594                                  | 1.6780  | 2.1688  |
| V22-174                                   | 0.4994  | -0.0700 |
| RC13-110                                  | 0.6403  | -0.2426 |
| <i>Dust</i>                               |         |         |
| ODP 659                                   | 0.356   | 0.646   |
| ODP 1090                                  | 0.9004  | -0.2768 |
| ODP 1090                                  | 0.8957  | -0.2884 |
| CLP                                       | -0.5902 | -0.4107 |
| PS75-074                                  | 0.8153  | -0.107  |
| PS75-076                                  | 0.8914  | -0.0061 |
| ODP 663                                   | 0.4237  | 0.6842  |
| EPICA Dome C                              | 0.8729  | -0.1856 |
| <i>Global <math>\delta^{13}C</math></i>   |         |         |
| ODP 982                                   | 0.0473  | -0.1403 |
| ODP 983                                   | 0.1598  | -0.1581 |
| ODP 984                                   | 0.1412  | -0.4831 |
| DSDP 607                                  | 0.4186  | 0.0256  |
| U 1308                                    | 0.3688  | 0.0163  |
| DSDP 502                                  | 0.0674  | -0.098  |
| ODP 980/981                               | 0.2748  | -0.1104 |
| ODP 664                                   | 0.3818  | 0.0776  |
| ODP 925                                   | 0.3548  | 0.027   |
| ODP 926                                   | 0.3949  | 0.0174  |
| ODP 927                                   | 0.3886  | 0.0161  |
| ODP 929                                   | 0.4186  | 0.0256  |
| ODP 928                                   | 0.4069  | 0.0414  |
| ODP 1090                                  | 0.3774  | 0.1325  |
| ODP 1143                                  | 0.1641  | -0.0143 |
| ODP 677                                   | 0.185   | -0.0199 |
| ODP 846                                   | 0.1795  | -0.0169 |
| ODP 849                                   | 0.1901  | -0.003  |
| <i>Atlantic <math>\delta^{13}C</math></i> |         |         |
| ODP 982                                   | 0.0459  | 0.1404  |
| ODP 983                                   | 0.1567  | 0.1579  |
| ODP 984                                   | 0.1373  | 0.4838  |
| DSDP 607                                  | 0.423   | -0.0194 |
| U 1308                                    | 0.3683  | -0.0141 |
| ODP 980/981                               | 0.2733  | 0.112   |
| DSDP 502                                  | 0.0674  | 0.0989  |
| ODP 664                                   | 0.3805  | -0.0756 |
| ODP 925                                   | 0.3555  | -0.0242 |
| ODP 926                                   | 0.3964  | -0.0136 |
| ODP 927                                   | 0.39    | -0.0129 |
| ODP 929                                   | 0.423   | -0.0194 |
| ODP 928                                   | 0.408   | -0.0379 |
| ODP 1090                                  | 0.3728  | -0.134  |
| <i>Pacific <math>\delta^{13}C</math></i>  |         |         |
| ODP 1143                                  | 0.5066  | -0.1312 |
| ODP 677                                   | 0.113   | 0.0389  |
| ODP 846                                   | 0.1482  | 0.1219  |
| ODP 849                                   | 0.2123  | 0.2073  |
